# Supplementary material for: Effects of human disturbances on wildlife behaviour and consequences for predator-prey overlap in Southeast Asia
Source: Springer Nature journal article supplement (doi:10.1038/s41467-024-45905-9), 2024-02-19
Supplement: 41467_2024_45905_MOESM1_ESM.pdf [file 41467_2024_45905_MOESM1_ESM.pdf]

## **Effects of human disturbances on wildlife behaviour and consequences for predator-prey overlap in Southeast Asia**

**Authors:** Samuel Xin Tham Lee<sup>1</sup>, Zachary Amir<sup>1</sup>, Jonathan H. Moore<sup>2,3</sup>, Kaitlyn M. Gaynor<sup>4</sup>, and Matthew Scott Luskin<sup>5,6\*</sup>

### **Affiliations:**

<sup>1</sup> School of the Environment, University of Queensland, Brisbane, Australia.

<sup>2</sup> School of Environmental Science and Engineering, Southern University of Science and Technology, Shenzhen, China.

<sup>3</sup> School of Environmental Sciences, University of East Anglia, Norwich, United Kingdom.

<sup>4</sup> Departments of Zoology and Botany, University of British Columbia, British Columbia, Canada.

<sup>5</sup> Institute of the Environment and Sustainability, University of California, Los Angeles, United States.

<sup>6</sup> Centre for Biodiversity and Conservation Science, University of Queensland, Brisbane, Australia.

# Supplementary Information

## Supplementary Figures

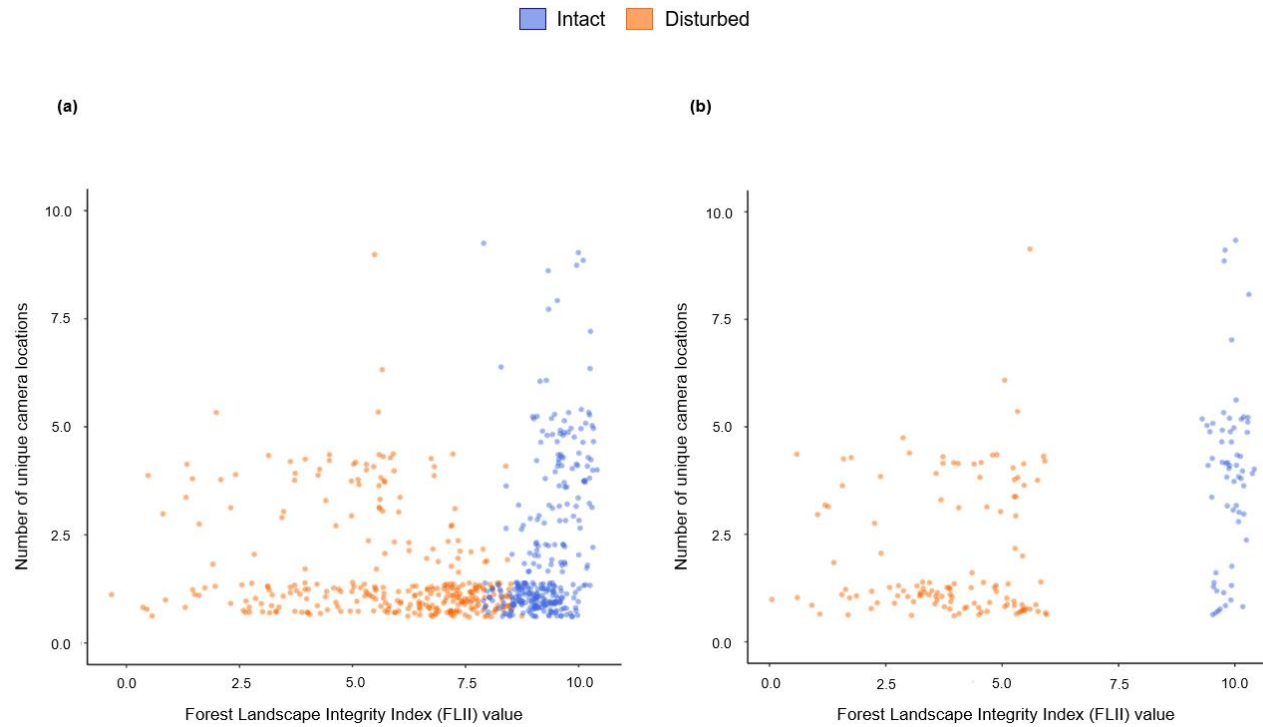

**Supplementary Figure 1. Forest Landscape Integrity Index scores for 1218 cameras were included in this study.** Cameras were grouped into roughly equal sample sizes of intact habitats (blue) or disturbed habitats (orange) based on the median ( $FLII_{median} = 8.77$ ) (a) or by the first ( $Q1 = 5.61$ ) and third ( $Q3 = 9.73$ ) quartiles of the forest integrity distribution (b). A jitter was applied to show overlapping points. Not shown in the plots are 46 unique cameras with forest integrity of 0 that were included in all analyses.

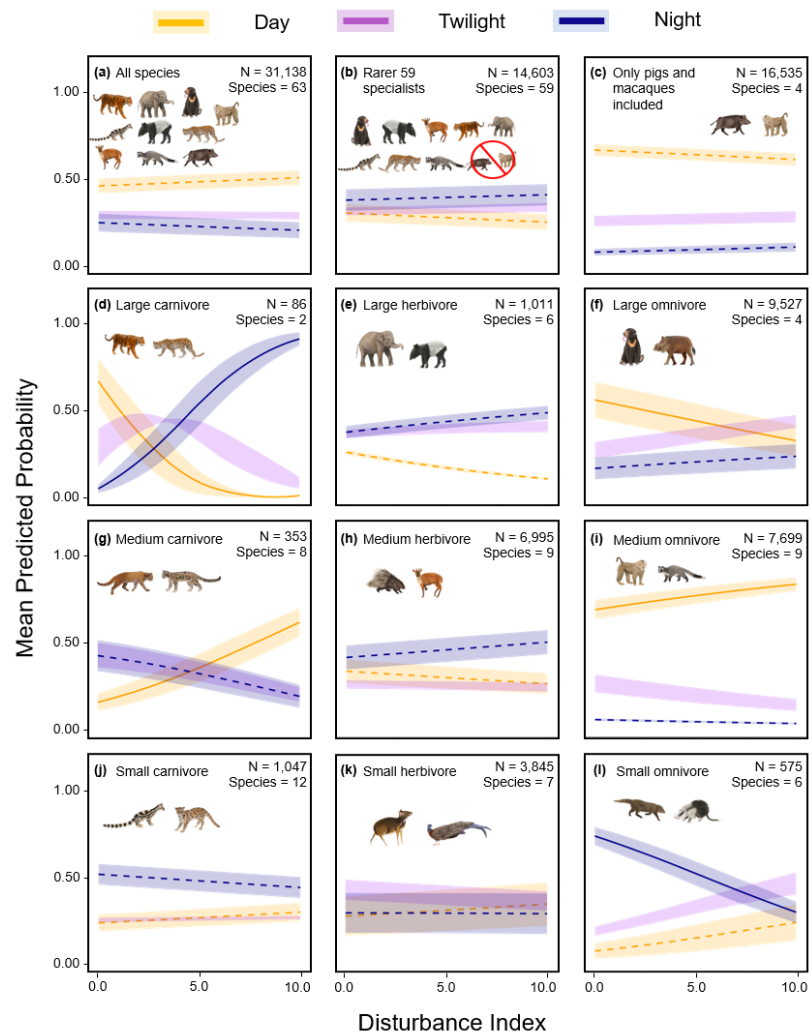

**Supplementary Figure 2. Influence of humans and forest disturbance on the diel activity of tropical vertebrate communities and guilds, excluding species-level random effect and thereby assessing combined effects of within-species behavioural changes and species replacements within guilds.** Interpretation is the same as for Fig. 4 in the main text.

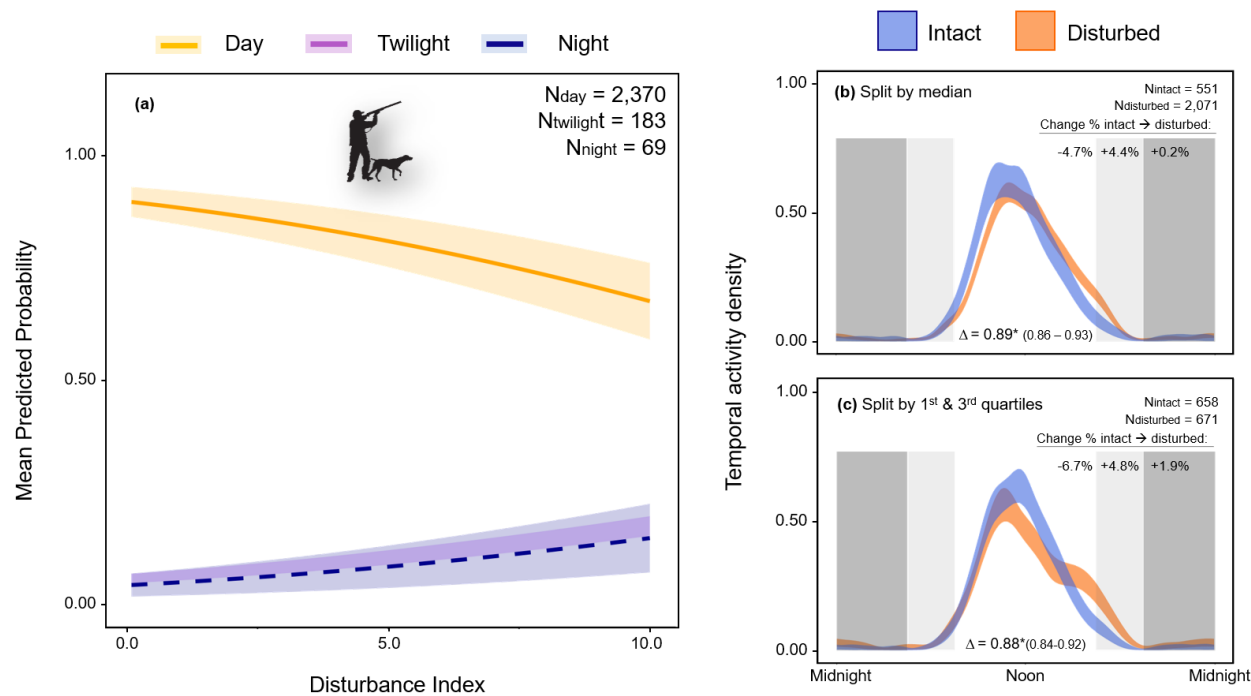

**Supplementary Figure 3. Human activity in Southeast Asian tropical forests, estimated using multinomial regressions (a) and kernel density (b-c).** The disturbance index is the inverse of the forest landscape integrity index (FLII; Grantham *et al.* 2020). Statistics for  $N_{\text{day}}$ ,  $N_{\text{twilight}}$ , and  $N_{\text{night}}$  are the independent detections per time period. Trend lines correspond to the change in mean predicted probabilities of diel activity occurring during the day, twilight and night (orange, purple and blue lines, respectively). Interpretations match the corresponding figure types in the main text. In panel (b), the ribbons show detections at 50% least (blue) and most disturbed forest cameras (orange; median FLII of 8.77) while panel (c) shows cameras in the least disturbed 25% of cameras (blue, FLII > 9.73) versus the most disturbed (orange, FLII < 5.61, 1<sup>st</sup> Quartile).

Temporal activity density

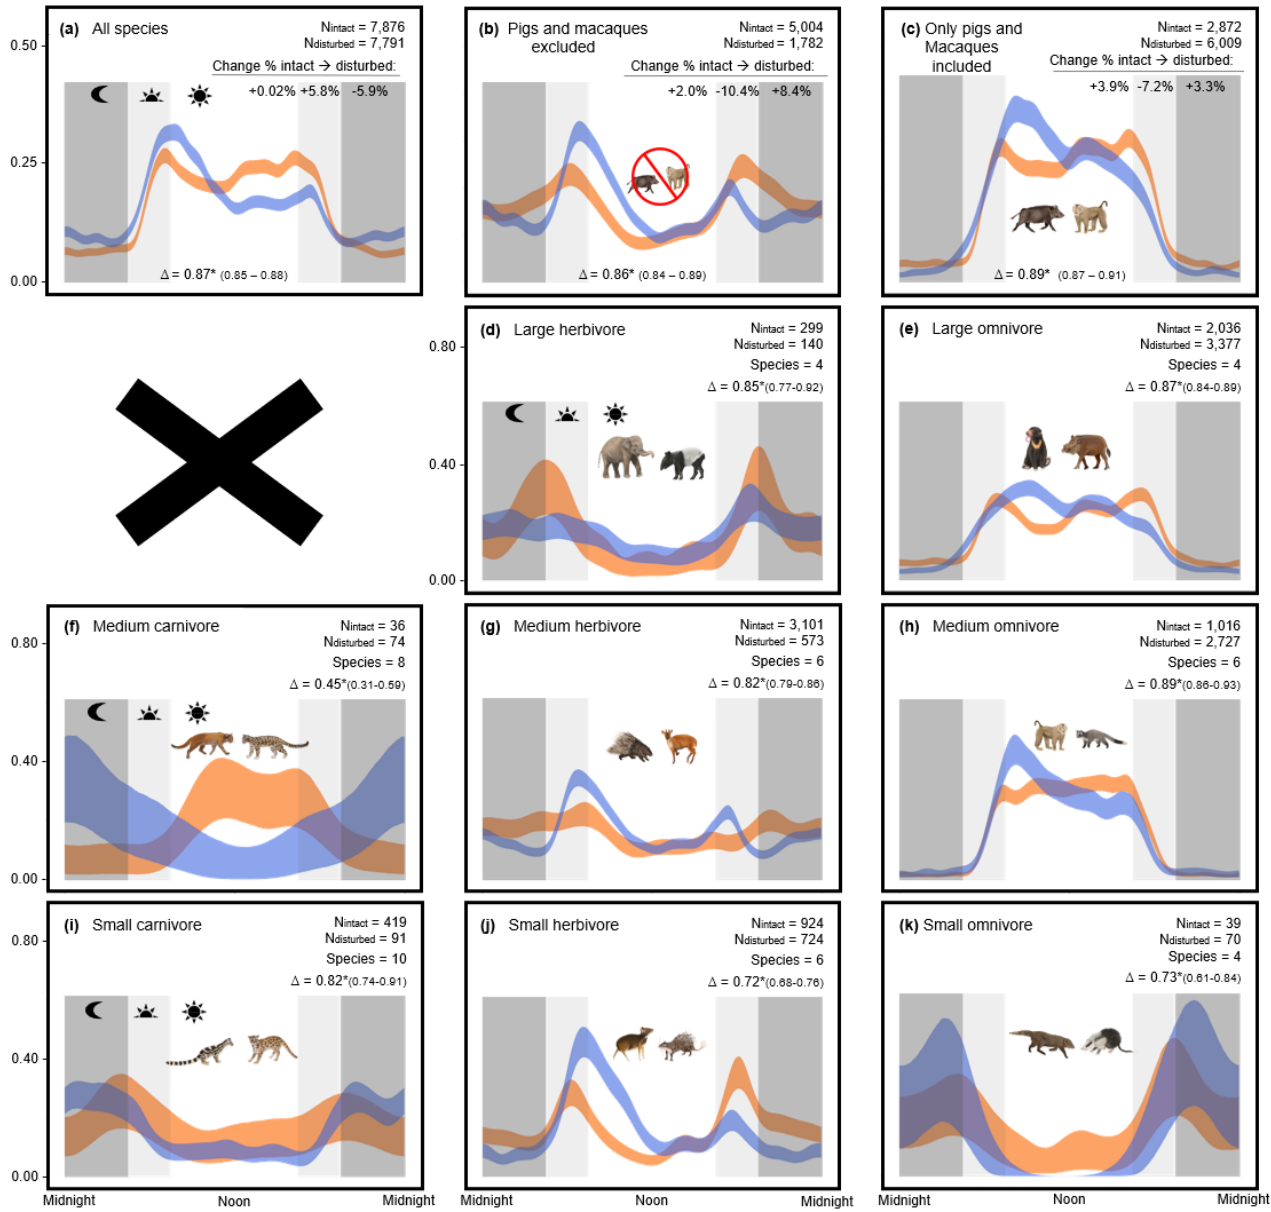

**Supplementary Figure 4. Wildlife and human activity in 25% most intact (blue) and 25% most disturbed forests (orange).** To assess the sensitivity of our results to the splitting cameras into low vs high disturbance using the median forest integrity, we reanalysed activity patterns comparing by 1st and 3rd quartiles of forest disturbance (i.e., very intact vs very disturbed). This more extreme split exhibited qualitatively similar results but more pronounced changes. For example, when comparing 1st and 3rd quartiles, all species showed a +5.8% increase in crepuscular detections in the most disturbed forests, compared to +2.0% when splitting at the median forest disturbance. When excluding pigs and macaques, the new quartiles split showed +8.4% nocturnal detections for the other 59 species in the most disturbed forest compared to +6.9% when splitting by median forest disturbance. Similar to the community-level sensitivity analyses, the extreme split led to guild-level activity patterns that also remained qualitatively similar but with more pronounced activity peaks and shifts. For example, medium carnivores increased their diurnal detections by +51% within the most disturbed forests compared to +25.8% when splitting by median forest disturbance. The exception was large and small herbivores that displayed similar trends with both splits, such as +2.3 % and +6.8% increase in crepuscular detections respectively within the most disturbed forests compared to -1.6% and -0.1% decrease respectively when splitting by median forest disturbance. Interpretations follow kernel density analyses and Figure 3 from the main text. Large carnivores were excluded from this analysis (× symbol) due to insufficient detections. The percentage change in detections per guild in diurnal, crepuscular and nocturnal periods is shown in Supplementary Table 5.

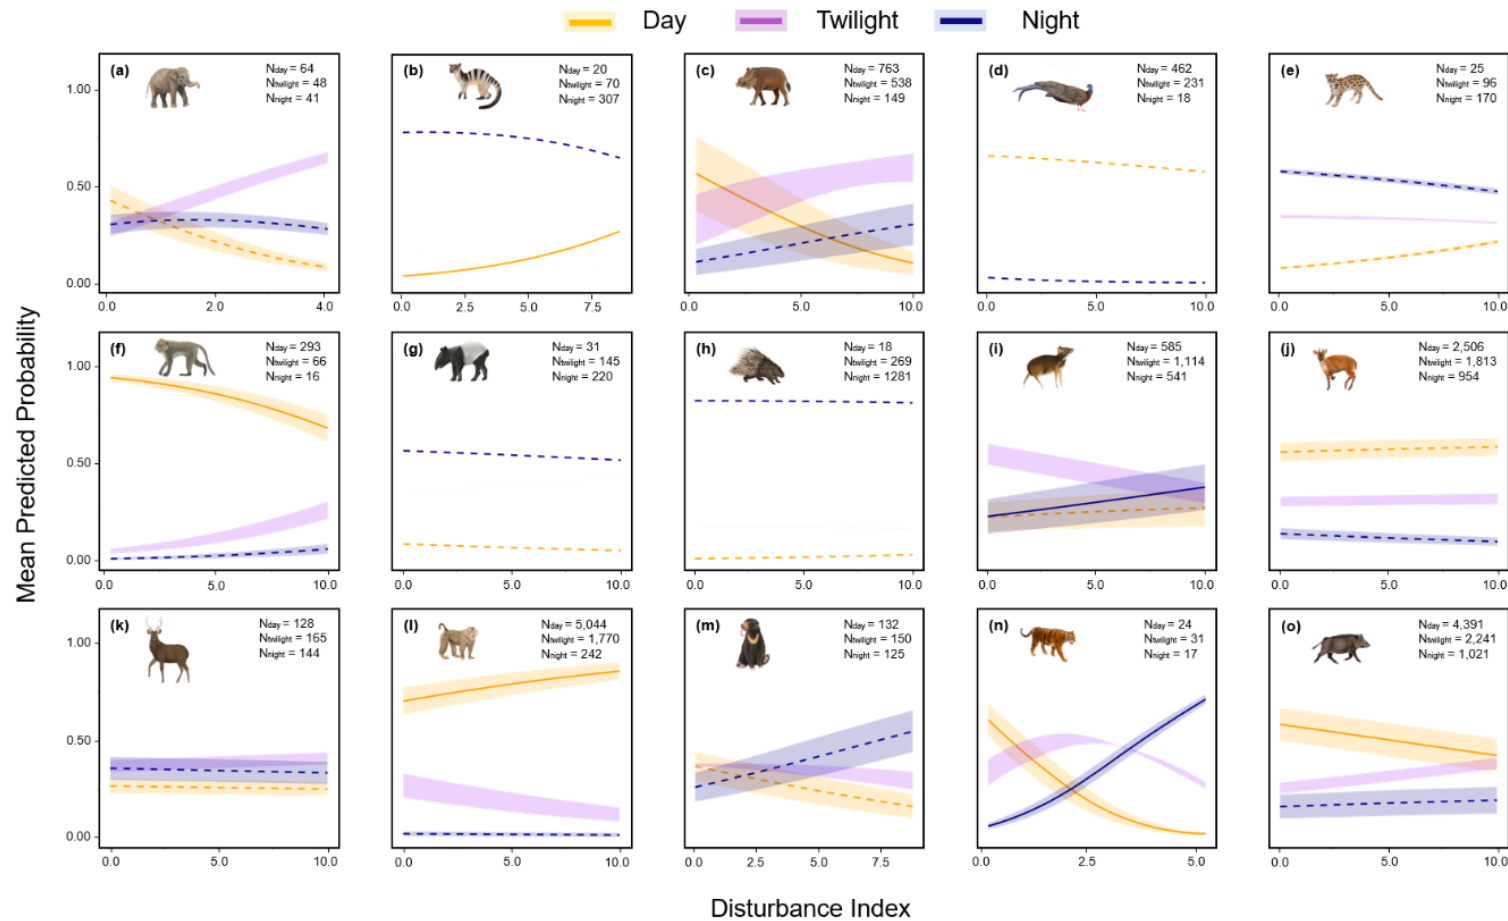

**Supplementary Figure 5. Influence of humans and forest degradation on the diel activity of 15 vertebrate species in Southeast Asia.** Panels show results for species with  $\geq 15$  detections in all three time periods, including (a) Asian elephant (*Elephas maximus*), (b) banded civet (*Hemigalus derbyanus*), (c) bearded pig (*Sus barbatus*), (d) great argus (*Argusianus argus*), (e) leopard cat (*Prionailurus spp.*), (f) long-tailed macaque (*Macaca fascicularis*), (g) Malay tapir (*Tapirus indicus*), (h) Malayan porcupine (*Hystrix brachyurus*), (i) mouse deer (*Tragulus spp.*), (j) red muntjac (*Muntiacus muntjak*), (k) sambar deer (*Rusa unicolor*), (l) southern pig-tailed macaque (*Macaca nemestrina*), (m) sun bear (*Helarctos malayanus*), (n) tiger (*Panthera tigris*), and (o) wild boar (*Sus scrofa*). Interpretations follow Fig. 4 in the main text.

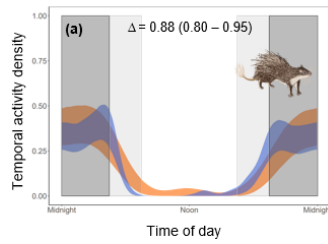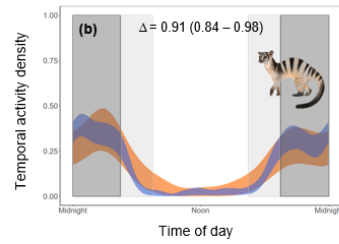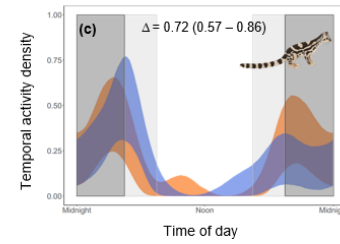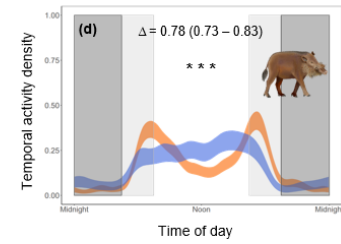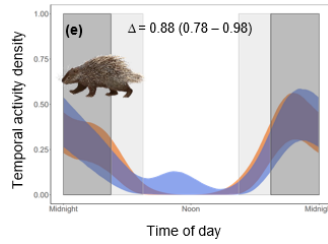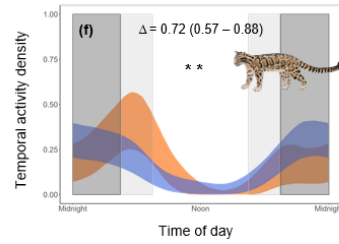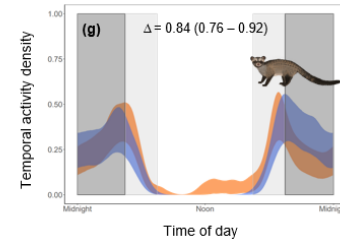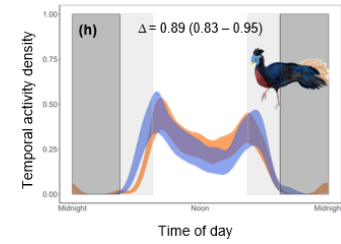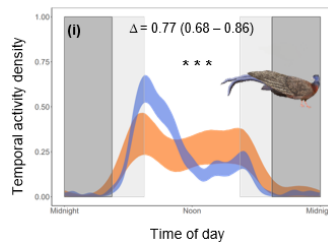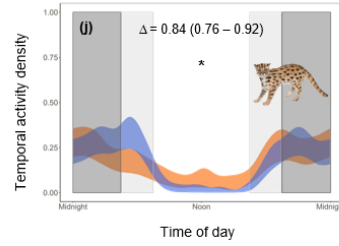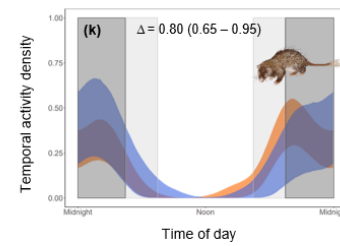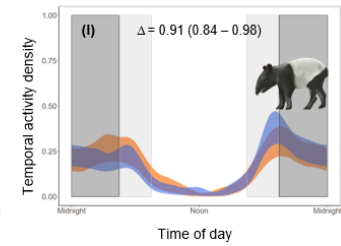



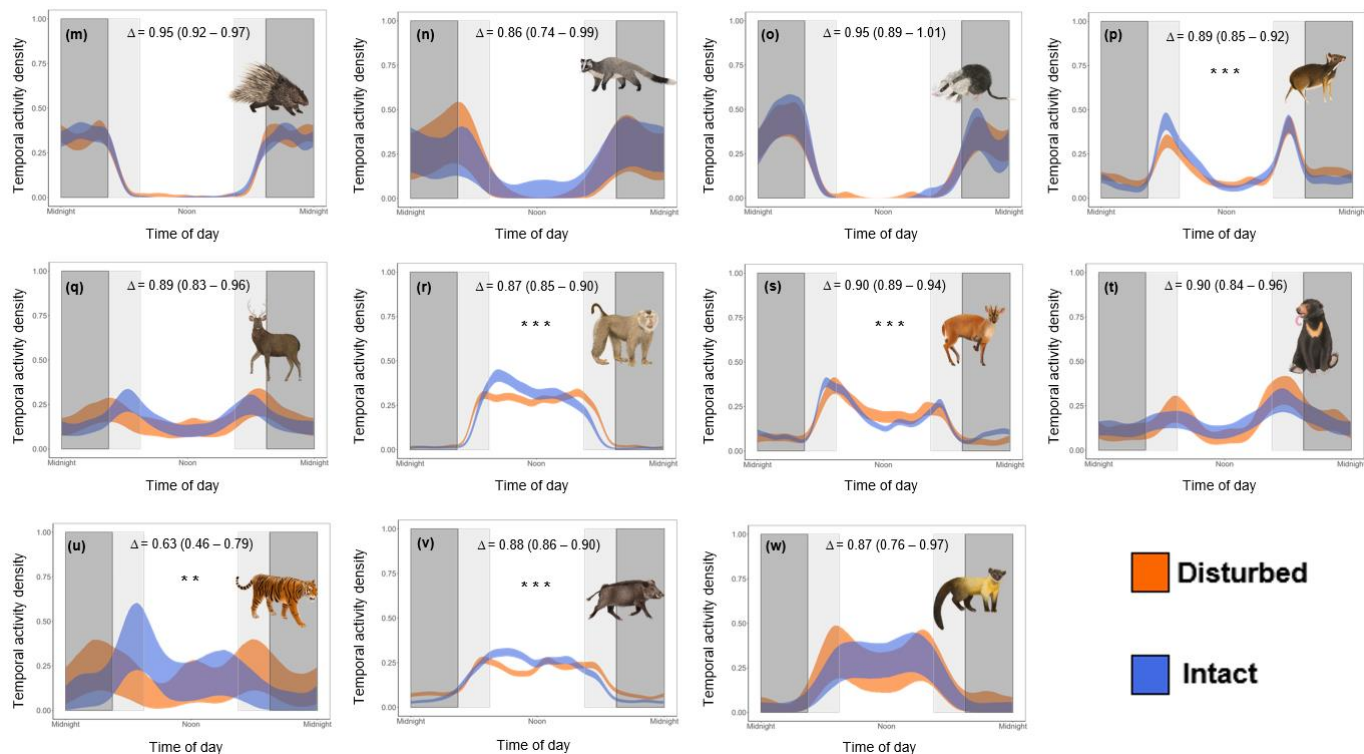

**Supplementary Figure 6. Activity patterns of 23 wildlife species in disturbed and intact forests of Southeast Asia.** The 23 species includes the Asiatic brush-tailed porcupine (a), banded civet (b), banded linsang (c), bearded pig (d), Bornean porcupine (e), clouded leopard (f), common palm civet (g), crested fireback pheasant (h), great argus (i), leopard cat (j), long-tailed porcupine (k), Malay tapir (l), Malayan porcupine (m), masked palm civet (n), moon rat (o), mouse deer (p), sambar deer (q), southern pig-tailed macaque (r), southern red muntjac (s), sun bear (t), tiger (u), wild boar (v), and yellow-throated marten (w). Ribbons show 95% confidence intervals from bootstrapped kernel activity densities functions. Blue ribbon shows intact forest (FLII > 8.77) and orange shows disturbed sites (FLII ≤ 8.77). “Δ” denotes the overlap or shared area found between the two activity distributions. The “\*” denotes the p-value for each comparison where “\*” indicates 0.01 < p ≤ 0.05, “\*\*” indicates 0.001 < p ≤ 0.01, “\*\*\*” indicates p ≤ 0.001 and “ ” indicates non-significance (p ≥ 0.05). Background shading denotes diurnal hours (white), crepuscular hours (light grey) and nocturnal hours (dark grey). For exact P-values, please refer to Supplementary Table 19.

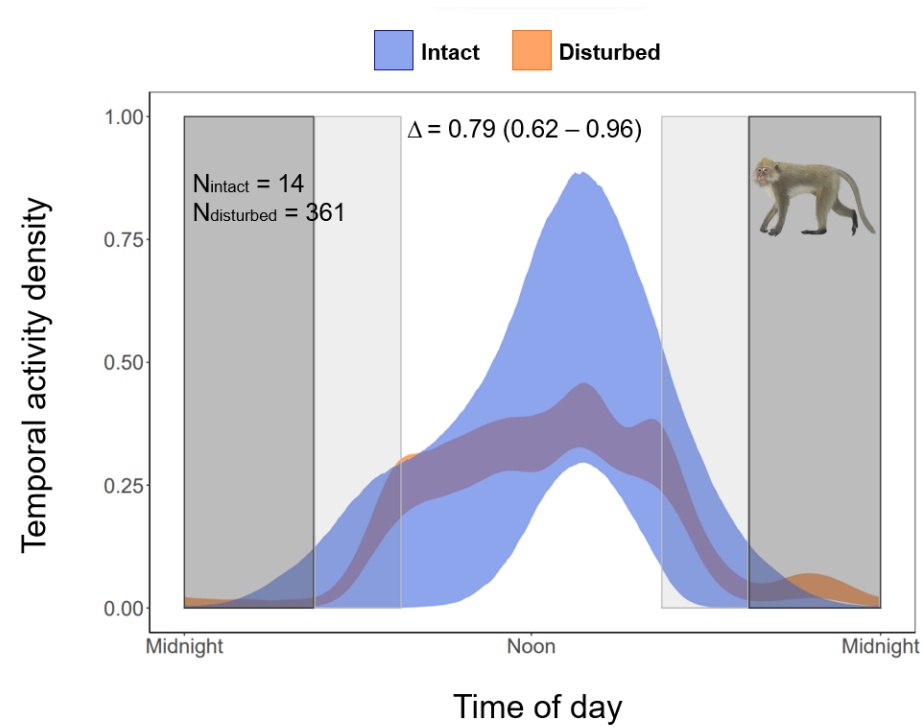

**Supplementary Figure 7. Activity pattern the common long-tailed macaque between intact and disturbed forests.** Ribbons show 95% confidence intervals from bootstrapped kernel activity densities functions. Blue ribbon shows intact forest ( $FLII > 8.77$ ) and orange shows disturbed sites ( $FLII \leq 8.77$ ). “ $\Delta$ ” denotes the overlap or shared area found between the two activity distributions. The shift was non-significant ( $P = 0.67$ ). Background shading denotes diurnal hours (white), crepuscular hours (light grey) and nocturnal hours (dark grey).

## Supplementary Tables

**Supplementary Table 1. Study site description and effort for new camera trapping.** Trap nights were estimated between each collected camera's first and last photos. MCP refers to the minimum convex polygon around the camera traps. To account for variation in deployment scale and spacing, we resampled all data by grouping cameras into 1-km apothem hexagonal units (3.45 km<sup>2</sup> cells). Therefore, the rows in the capture histories all represent the same sampling area, and because some cells had more than one camera, we included trapping effort per cell per sampling window as a covariate of detection.

| Survey                                | Annual rainfall | Cameras collected | Effort (trap nights) | Duration                   | Elevation (Mean ± SD) | Elevation range | MCP    | Camera spacing |
|---------------------------------------|-----------------|-------------------|----------------------|----------------------------|-----------------------|-----------------|--------|----------------|
| <b>THAILAND</b>                       |                 |                   |                      |                            |                       |                 |        |                |
| <b>Khao Chong / Khao Ban Tat 2018</b> | 2014.28         | 76                | 3957                 | 2018-02-01 –<br>2018-04-30 | 524.59 ± 270.92       | 103 – 1234      | 59.01  | 467.95         |
| <b>Khao Yai 2019</b>                  | 1119.49         | 61                | 3553                 | 2019-07-01 –<br>2019-09-25 | 769.64 ± 38.56        | 582 – 816       | 22.54  | 464.42         |
| <b>SUMATRA</b>                        |                 |                   |                      |                            |                       |                 |        |                |
| <b>Gunung Leuser 2014</b>             | 2828.00         | 69                | 3401                 | 2013-12-18 –<br>2014-05-22 | 316.03 ± 250.38       | 25 – 888        | 516.15 | 1275.27        |
| <b>Kerinci Seblat 2014</b>            | 2406.94         | 98                | 5356                 | 2014-02-10 –<br>2014-10-04 | 594.03 ± 194.46       | 252 – 1154      | 813.69 | 1169.04        |
| <b>Bukit Barisan Selatan 2014</b>     | 2987.80         | 79                | 5750                 | 2014-06-15 –<br>2014-09-20 | 369.75 ± 184.97       | 116 – 935       | 473.58 | 1139.96        |
| <b>MALAYSIAN BORNEO</b>               |                 |                   |                      |                            |                       |                 |        |                |
| <b>Danum Valley 2019 (Sabah)</b>      | 2182.68         | 22                | 1292                 | 2019-05-24 –<br>2019-09-26 | 256.73 ± 102.02       | 184 – 567       | 8.31   | 520.76         |
| <b>Danum Valley 2018 (Sabah)</b>      | 2182.85         | 27                | 1849                 | 2018-07-12 –<br>2018-10-30 | 249.63 ± 53.23        | 175 – 381       | 15.95  | 614.15         |

|                                       |         |     |      |                            |                 |                   |        |         |
|---------------------------------------|---------|-----|------|----------------------------|-----------------|-------------------|--------|---------|
| <b>Lambir Hills 2017</b><br>(Sarawak) | 3078.82 | 67  | 2406 | 2017-05-23 –<br>2017-07-07 | 164.80 ± 65.31  | 60.31 –<br>421.44 | 22.06  | 459.95  |
| <b>PENINSULAR MALAYSIA</b>            |         |     |      |                            |                 |                   |        |         |
| <b>Pasoh 2013</b>                     | 2081.40 | 58  | 1399 | 2013-05-29 –<br>2014-02-12 | 297.09 ± 160.10 | 98 – 674          | 133.53 | 1316.26 |
| <b>Pasoh 2014</b>                     | 2079.16 | 57  | 1314 | 2014-05-13 –<br>2014-08-01 | 303.14 ± 160.04 | 98 – 674          | 134.62 | 1321.48 |
| <b>Pasoh 2015</b>                     | 2079.78 | 59  | 1670 | 2015-05-07 –<br>2015-09-04 | 301.15 ± 158.15 | 98 – 674          | 134.62 | 1317.78 |
| <b>Pasoh 2016</b>                     | 2086.38 | 42  | 1305 | 2017-05-17 –<br>2017-08-29 | 308.98 ± 156.05 | 103 – 674         | 122.63 | 1416.43 |
| <b>Ulu Muda 2015a</b>                 | 2057.03 | 76  | 4242 | 2014-11-01 –<br>2015-01-30 | 278.58 ± 128.68 | 117 – 628         | 68.98  | 938.65  |
| <b>Ulu Muda 2015b</b>                 | 2063.01 | 112 | 4446 | 2015-01-31 –<br>2015-05-01 | 295.77 ± 139.83 | 117-843           | 113.61 | 731.56  |
| <b>Ulu Muda 2015c</b>                 | 2080.90 | 52  | 3582 | 2015-05-02 –<br>2015-07-31 | 325.38 ± 166.15 | 141-843           | 115.53 | 1227.86 |
| <b>Ulu Muda 2015d</b>                 | 2078.17 | 48  | 2862 | 2015-08-01 –<br>2015-10-30 | 328.92 ± 165.27 | 123-843           | 104.01 | 1237.85 |
| <b>Ulu Muda 2016a</b>                 | 2065.89 | 73  | 2220 | 2015-10-31 –<br>2016-01-29 | 313.62 ± 145.27 | 117-748           | 103.17 | 794.92  |
| <b>Ulu Muda 2016b</b>                 | 2054.55 | 60  | 2899 | 2016-01-30 –<br>2016-04-29 | 285.45 ± 135.12 | 117-628           | 66.96  | 958.39  |
| <b>Ulu Muda 2016c</b>                 | 2060.54 | 46  | 2746 | 2016-04-30 –<br>2016-07-22 | 301.30 ± 138.91 | 117-628           | 65.72  | 974.47  |
| <b>SINGAPORE</b>                      |         |     |      |                            |                 |                   |        |         |
| <b>Singapore 2019</b>                 | 2283.97 | 36  | 2359 | 2018-12-26 –<br>2019-03-17 | 41.44 ± 22.18   | 0 – 83            | 162.35 | 261.70  |

**Supplementary Table 2. Species selected for the community and guild-level temporal shift analyses.** Each species' total number of detections was pooled across 10 forested landscapes in Southeast Asia. The 'IUCN' column refers to the IUCN Conservation Status of the species (*i.e.*, 'LC' = Least Concern, 'NT' = Near Threatened, 'VU' = Vulnerable, 'EN' = Endangered, 'CR' = Critically Endangered, 'DD' = Data Deficient). The 'Landscape detected' column refers to the number of landscapes that species was detected. Lastly, the 'Trophic guild' column refers to the trophic level occupied by a species based on diet and body mass (Refer to section 2.3 of methods for assigning guilds).

| Common name        | Scientific name                   | IUCN | Landscape detected | Total detections | Feeding guild | Body mass (kg) | Trophic guild    |
|--------------------|-----------------------------------|------|--------------------|------------------|---------------|----------------|------------------|
| Leopard            | <i>Panthera pardus</i>            | VU   | 2                  | 14               | Carnivore     | 52             | Large carnivore  |
| Tiger              | <i>Panthera tigris</i>            | EN   | 3                  | 72               | Carnivore     | 163            | Large carnivore  |
| Gaur               | <i>Bos gaurus</i>                 | VU   | 1                  | 8                | Herbivore     | 665            | Large herbivore  |
| Chinese serow      | <i>Capricornis milneedwardsii</i> | NT   | 1                  | 6                | Herbivore     | 150            | Large herbivore  |
| Mainland serow     | <i>Capricornis sumatraensis</i>   | VU   | 2                  | 11               | Herbivore     | 80             | Large herbivore  |
| Asian elephant     | <i>Elephas maximus</i>            | EN   | 5                  | 153              | Herbivore     | 3320           | Large herbivore  |
| Sambar deer        | <i>Rusa unicolor</i>              | VU   | 8                  | 437              | Herbivore     | 170            | Large herbivore  |
| Malay tapir        | <i>Tapirus indicus</i>            | EN   | 5                  | 396              | Herbivore     | 308            | Large herbivore  |
| Sun bear           | <i>Helarctos malayanus</i>        | VU   | 8                  | 407              | Omnivore      | 57             | Large omnivore   |
| Bearded pig        | <i>Sus barbatus</i>               | VU   | 4                  | 1450             | Omnivore      | 135            | Large omnivore   |
| Wild boar          | <i>Sus scrofa</i>                 | VU   | 8                  | 7654             | Omnivore      | 85             | Large omnivore   |
| Asiatic black bear | <i>Ursus thibetanus</i>           | VU   | 3                  | 16               | Omnivore      | 100            | Large omnivore   |
| Asiatic golden cat | <i>Catopuma temminckii</i>        | NT   | 4                  | 31               | Carnivore     | 7.7            | Medium carnivore |
| Dhole              | <i>Cuon alpinus</i>               | EN   | 2                  | 30               | Carnivore     | 16             | Medium carnivore |
| Clouded leopard    | <i>Neofelis spp.</i>              | VU   | 7                  | 113              | Carnivore     | 15             | Medium carnivore |
| Clouded monitor    | <i>Varanus nebulosus</i>          | NT   | 1                  | 38               | Carnivore     | 4.3            | Medium carnivore |

|                              |                                 |    |   |      |           |      |                  |
|------------------------------|---------------------------------|----|---|------|-----------|------|------------------|
| Common water monitor         | <i>Varanus salvator</i>         | LC | 4 | 32   | Carnivore | 20   | Medium carnivore |
| Large spotted civet          | <i>Viverra zibetha</i>          | EN | 2 | 4    | Carnivore | 9.1  | Medium carnivore |
| Malay civet                  | <i>Viverra zibetha</i>          | LC | 4 | 59   | Carnivore | 7.4  | Medium carnivore |
| Large Indian civet           | <i>Viverra zibetha</i>          | LC | 3 | 46   | Carnivore | 9.2  | Medium carnivore |
| Malayan porcupine            | <i>Hystrix brachyura</i>        | LC | 9 | 1568 | Herbivore | 8.0  | Medium herbivore |
| Bornean porcupine            | <i>Hystrix crassispinis</i>     | LC | 2 | 109  | Herbivore | 4.6  | Medium herbivore |
| Sumatran mountain muntjac    | <i>Muntiacus montanus</i>       | DD | 1 | 1    | Herbivore | 17.4 | Medium herbivore |
| Southern red muntjac         | <i>Muntiacus muntjak</i>        | LC | 9 | 5273 | Herbivore | 17.4 | Medium herbivore |
| Yellow-handed mitered langur | <i>Presbytis melalophos</i>     | EN | 1 | 1    | Herbivore | 6.5  | Medium herbivore |
| Red langur                   | <i>Presbytis rubicunda</i>      | LC | 4 | 21   | Herbivore | 6.4  | Medium herbivore |
| White-thighed surili         | <i>Presbytis siamensis</i>      | NT | 1 | 1    | Herbivore | 6.5  | Medium herbivore |
| Siamang                      | <i>Symphalangus syndactylus</i> | EN | 1 | 5    | Herbivore | 12   | Medium herbivore |
| Dusky langur                 | <i>Trachypithecus obscurus</i>  | NT | 2 | 16   | Herbivore | 7.1  | Medium herbivore |
| Binturong                    | <i>Arctictis binturong</i>      | VU | 9 | 54   | Omnivore  | 13   | Medium omnivore  |
| Greater hog badger           | <i>Arctonyx collaris</i>        | VU | 1 | 8    | Omnivore  | 8.2  | Medium omnivore  |
| Sumatran hog badger          | <i>Arctonyx hoevenii</i>        | LC | 2 | 11   | Omnivore  | 8.2  | Medium omnivore  |
| Golden jackal                | <i>Canis aureus</i>             | LC | 1 | 2    | Omnivore  | 9.7  | Medium omnivore  |
| Stump-tailed macaque         | <i>Macaca arctoides</i>         | VU | 1 | 76   | Omnivore  | 9.4  | Medium omnivore  |
| Common long-tailed macaque   | <i>Macaca fascicularis</i>      | LC | 7 | 375  | Omnivore  | 4.6  | Medium omnivore  |

|                                |                                   |    |    |      |           |       |                 |
|--------------------------------|-----------------------------------|----|----|------|-----------|-------|-----------------|
| Southern pig-tailed macaque    | <i>Macaca nemestrina</i>          | VU | 9  | 7056 | Omnivore  | 7.9   | Medium omnivore |
| Sunda pangolin                 | <i>Manis javanica</i>             | CR | 3  | 41   | Omnivore  | 4.9   | Medium omnivore |
| Masked palm civet              | <i>Paguma larvata</i>             | LC | 6  | 76   | Omnivore  | 4.3   | Medium omnivore |
| Banded civet                   | <i>Hemigalus derbyanus</i>        | NT | 8  | 397  | Carnivore | 1.3   | Small carnivore |
| Crab-eating mongoose           | <i>Herpestes urva</i>             | LC | 4  | 69   | Carnivore | 2.4   | Small carnivore |
| Yellow-throated marten         | <i>Martes flavigula</i>           | LC | 9  | 125  | Carnivore | 2.5   | Small carnivore |
| Malay weasel                   | <i>Mustela nudipes</i>            | LC | 1  | 2    | Carnivore | 0.57  | Small carnivore |
| Sunda stink badger             | <i>Mydaus javanensis</i>          | LC | 1  | 36   | Carnivore | 2.5   | Small carnivore |
| Changeable hawk eagle          | <i>Nisaetus cirrhatus</i>         | LC | 1  | 1    | Carnivore | 1.5   | Small carnivore |
| Marbled cat                    | <i>Pardofelis marmorata</i>       | NT | 7  | 42   | Carnivore | 2.8   | Small carnivore |
| Leopard cat                    | <i>Prionailurus spp.</i>          | LC | 10 | 291  | Carnivore | 2.8   | Small carnivore |
| Flat-headed cat                | <i>Prionailurus planiceps</i>     | EN | 1  | 1    | Carnivore | 3.5   | Small carnivore |
| Banded linsang                 | <i>Prionodon linsang</i>          | LC | 7  | 71   | Carnivore | 0.69  | Small carnivore |
| House shrew                    | <i>Suncus murinus</i>             | LC | 1  | 7    | Carnivore | 0.043 | Small carnivore |
| Small Indian civet             | <i>Viverricula indica</i>         | LC | 1  | 5    | Carnivore | 3.0   | Small carnivore |
| Great argus                    | <i>Argusianus argus</i>           | VU | 3  | 711  | Herbivore | 2.0   | Small herbivore |
| Asiatic brush-tailed porcupine | <i>Atherurus macrourus</i>        | LC | 3  | 271  | Herbivore | 2.0   | Small herbivore |
| Crested fireback pheasant      | <i>Lophura spp.</i>               | VU | 5  | 522  | Herbivore | 1.8   | Small herbivore |
| Black giant squirrel           | <i>Ratufa bicolor</i>             | NT | 1  | 1    | Herbivore | 1.6   | Small herbivore |
| Indomalayan bamboo rat         | <i>Rhizomys sumatrensis</i>       | LC | 1  | 1    | Herbivore | 2.5   | Small herbivore |
| Mouse deer                     | <i>Tragulus spp.</i>              | LC | 10 | 2240 | Herbivore | 3.6   | Small herbivore |
| Long-tailed porcupine          | <i>Trichys fasciculata</i>        | LC | 6  | 99   | Herbivore | 1.8   | Small herbivore |
| Small-toothed palm civet       | <i>Arctogalidia trivirgata</i>    | LC | 2  | 3    | Omnivore  | 2.3   | Small omnivore  |
| Moon rat                       | <i>Echinosorex gymnura</i>        | LC | 7  | 281  | Omnivore  | 1.0   | Small omnivore  |
| Short-tailed mongoose          | <i>Herpestes brachyurus</i>       | NT | 5  | 23   | Omnivore  | 1.4   | Small omnivore  |
| Javan mongoose                 | <i>Herpestes javanicus</i>        | LC | 2  | 2    | Omnivore  | 0.77  | Small omnivore  |
| Bulwer's pheasant              | <i>Lophura bulweri</i>            | VU | 1  | 6    | Omnivore  | 1.2   | Small omnivore  |
| Common palm civet              | <i>Paradoxurus hermaphroditus</i> | LC | 7  | 260  | Omnivore  | 3.2   | Small omnivore  |

**Supplementary Table 3. Species selected for species-level temporal shifts via the multinomial regression modelling approach.** Each species' total number of detections was pooled across 10 forested landscapes in Southeast Asia. The “Day”, “Night”, and “Twilight” columns refer to the independent detections found within the “day” (0730 – 1630 hrs; 9 hours total), “night” (1930 – 0430 hrs; 9 hours total), and “twilight” (0430 – 0730 hrs or 1630 – 1930 hrs; 6 hours total) diel categories respectively. Only species with  $\geq 15$  detections in each diel category was included in this analysis.

| Common name                 | Scientific name            | Total detections | Day  | Night | Twilight |
|-----------------------------|----------------------------|------------------|------|-------|----------|
| Asian elephant              | <i>Elephas maximus</i>     | 153              | 64   | 41    | 48       |
| Banded civet                | <i>Hemigalus derbyanus</i> | 397              | 20   | 307   | 70       |
| Bearded pig                 | <i>Sus barbatus</i>        | 1450             | 763  | 149   | 538      |
| Common long-tailed macaque  | <i>Macaca fascicularis</i> | 375              | 293  | 16    | 66       |
| Great argus                 | <i>Argusianus argus</i>    | 711              | 462  | 18    | 231      |
| Leopard cat                 | <i>Prionailurus spp.</i>   | 291              | 25   | 170   | 96       |
| Malay tapir                 | <i>Tapirus indicus</i>     | 396              | 31   | 220   | 145      |
| Malayan porcupine           | <i>Hystrix brachyura</i>   | 1568             | 18   | 1281  | 269      |
| Mouse deer                  | <i>Tragulus spp.</i>       | 2240             | 585  | 541   | 1114     |
| Sambar deer                 | <i>Rusa unicolor</i>       | 437              | 128  | 144   | 165      |
| Southern pig-tailed macaque | <i>Macaca nemestrina</i>   | 7056             | 5044 | 242   | 1770     |
| Southern red muntjac        | <i>Muntiacus muntjak</i>   | 5273             | 2506 | 954   | 1813     |
| Sun bear                    | <i>Helarctos malayanus</i> | 407              | 132  | 125   | 150      |
| Tiger                       | <i>Panthera tigris</i>     | 72               | 24   | 17    | 31       |
| Wild boar                   | <i>Sus scrofa</i>          | 7654             | 4391 | 1021  | 2242     |



**Supplementary Table 4. Species selected for species-level kernel density estimations as well as species pair overlap analyses.** Each species' total number of detections was pooled across 10 forested landscapes in Southeast Asia. 'Intact detections' refer to total species detections within intact (FLII > 8.77) sites while 'Disturbed detections' refer to total species detections within disturbed (FLII ≤ 8.77) sites. 'Trophic guild' refers to the trophic level occupied by a species based on diet and body mass (Refer to section 2.3 of methods for assigning guilds).

| Common name            | Scientific name             | Total detections | Intact detections | Disturbed detections | Feeding guild | Body      | Trophic guild    |
|------------------------|-----------------------------|------------------|-------------------|----------------------|---------------|-----------|------------------|
|                        |                             |                  |                   |                      |               | mass (kg) |                  |
| Tiger                  | <i>Panthera tigris</i>      | 72               | 38                | 34                   | Carnivore     | 163       | Large carnivore  |
| Sambar deer            | <i>Rusa unicolor</i>        | 437              | 273               | 164                  | Herbivore     | 170       | Large herbivore  |
| Malay tapir            | <i>Tapirus indicus</i>      | 396              | 229               | 167                  | Herbivore     | 308       | Large herbivore  |
| Sun bear               | <i>Helarctos malayanus</i>  | 407              | 231               | 176                  | Omnivore      | 57        | Large omnivore   |
| Wild boar              | <i>Sus scrofa</i>           | 7654             | 3364              | 4290                 | Omnivore      | 84        | Large omnivore   |
| Bearded pig            | <i>Sus barbatus</i>         | 1450             | 418               | 1032                 | Omnivore      | 135       | Large omnivore   |
| Clouded leopard        | <i>Neofelis spp.</i>        | 113              | 73                | 40                   | Carnivore     | 15        | Medium carnivore |
| Bornean porcupine      | <i>Hystrix crassispinis</i> | 109              | 45                | 64                   | Herbivore     | 4.6       | Medium herbivore |
| Malayan porcupine      | <i>Hystrix brachyura</i>    | 1568             | 867               | 701                  | Herbivore     | 8.0       | Medium herbivore |
| Southern red muntjac   | <i>Muntiacus muntjak</i>    | 5273             | 4264              | 1009                 | Herbivore     | 17        | Medium herbivore |
| Masked palm civet      | <i>Paguma larvata</i>       | 76               | 40                | 36                   | Omnivore      | 4.3       | Medium omnivore  |
| Pig-tailed macaque     | <i>Macaca nemestrina</i>    | 7056             | 2201              | 4855                 | Omnivore      | 7.9       | Medium omnivore  |
| Banded linsang         | <i>Prionodon linsang</i>    | 71               | 35                | 36                   | Carnivore     | 0.69      | Small carnivore  |
| Banded civet           | <i>Hemigalus derbyanus</i>  | 397              | 317               | 80                   | Carnivore     | 1.3       | Small carnivore  |
| Yellow-throated marten | <i>Martes flavigula</i>     | 125              | 74                | 51                   | Carnivore     | 2.5       | Small carnivore  |
| Leopard cat            | <i>Prionailurus spp.</i>    | 291              | 180               | 111                  | Carnivore     | 2.8       | Small carnivore  |

|                           |                                   |      |      |      |           |     |                 |
|---------------------------|-----------------------------------|------|------|------|-----------|-----|-----------------|
| Long-tailed porcupine     | <i>Trichys fasciculata</i>        | 99   | 20   | 79   | Herbivore | 1.8 | Small herbivore |
| Crested fireback pheasant | <i>Lophura spp.</i>               | 522  | 211  | 311  | Herbivore | 1.8 | Small herbivore |
| Great argus               | <i>Argusianus argus</i>           | 711  | 614  | 97   | Herbivore | 2.0 | Small herbivore |
| Brush-tailed porcupine    | <i>Atherurus macrourus</i>        | 271  | 196  | 75   | Herbivore | 2.0 | Small herbivore |
| Mousedeer                 | <i>Tragulus sp.</i>               | 2240 | 1053 | 1187 | Herbivore | 3.6 | Small herbivore |
| Moon rat                  | <i>Echinosorex gymnura</i>        | 281  | 123  | 158  | Omnivore  | 1.0 | Small omnivore  |
| Common palm civet         | <i>Paradoxurus hermaphroditus</i> | 260  | 111  | 149  | Omnivore  | 3.2 | Small omnivore  |

**Supplementary Table 5. Percentage change in diurnal, crepuscular and nocturnal detections from intact (FLII > 8.77) forests to disturbed (FLII ≤ 8.77) forests at the guild-level.** Percentage change is calculated by the difference between percentage detections of a specific diel niche within disturbed forests versus intact forests, *i.e.*, (diurnal detections in disturbed habitats / total detections in disturbed habitats - diurnal detections in intact habitats / total detections in intact habitats) \*100. The “Splitting method” column refers to how we define whether a camera site is “intact” or “disturbed” (refer to 2.2 of methods for clarification). The “large carnivore” guild is not included when splitting camera sites by the 1<sup>st</sup> and 3<sup>rd</sup> quantiles as there is insufficient sample size to perform the analysis (N < 20).

| <b>Splitting method</b>    | <b>Guild</b>     | <b>% Change in diurnal detections</b> | <b>% Change in crepuscular detections</b> | <b>% Change in nocturnal detections</b> |
|----------------------------|------------------|---------------------------------------|-------------------------------------------|-----------------------------------------|
| Split by median FLII       |                  | -                                     | -                                         | -                                       |
|                            | Large carnivore  | -21.9%                                | +5.4%                                     | +16.5%                                  |
|                            | Large herbivore  | -8.2%                                 | -1.6%                                     | +9.7%                                   |
|                            | Large omnivore   | -10.7%                                | +5.9%                                     | +4.8%                                   |
|                            | Medium carnivore | +25.8%                                | +0.4%                                     | -26.2%                                  |
|                            | Medium herbivore | -6.5%                                 | -6.7%                                     | +13.1%                                  |
|                            | Medium omnivore  | -7.1%                                 | +8.2%                                     | -1.1%                                   |
|                            | Small carnivore  | +5.3%                                 | +0.7%                                     | -5.9%                                   |
|                            | Small herbivore  | -7.3%                                 | -0.1%                                     | +7.3%                                   |
|                            | Small omnivore   | +6.1%                                 | +3.9%                                     | -10.0%                                  |
| Split by Q1 and Q3 of FLII |                  | -                                     | -                                         | -                                       |
|                            | Large herbivore  | -9.1%                                 | +2.3%                                     | +6.8%                                   |
|                            | Large omnivore   | -10.8%                                | +5.8%                                     | +5.0%                                   |
|                            | Medium carnivore | +51.0%                                | -8.9%                                     | -42.1%                                  |
|                            | Medium herbivore | -8.1%                                 | -7.5%                                     | +15.6%                                  |
|                            | Medium omnivore  | -1.4%                                 | +2.8%                                     | -1.3%                                   |

|                 |        |        |        |
|-----------------|--------|--------|--------|
| Small carnivore | +8.4%  | +6.1%  | -14.5% |
| Small herbivore | -23.2% | +6.8%  | +16.3% |
| Small omnivore  | +15.7% | +15.2% | -30.9% |

**Supplementary Table 6. Guild-level temporal outputs using kernel density estimation. ‘AP<sub>Intact</sub>’ and ‘AP<sub>Disturbed</sub>’ signifies the activity peaks at intact (FLII > 8.77) and disturbed (FLII ≤ 8.77) sites respectively. P-values are estimated using the two-sided compareCkern test, however, no further statistical adjustments were made for each comparison (Note that the compareCkern function outputs “0” when P < 0.001, which we report here as “P < 0.001”). ‘Δ (95% CI)’ represents the estimated overlap coefficients and their associated 95% confidence interval. ‘1 - Δ’ is the change in temporal overlap between intact and disturbed forests for a given trophic guild.**

| <b>Trophic guild</b> | <b>P-value</b> | <b>AP<sub>Intact</sub></b> | <b>AP<sub>Disturbed</sub></b> | <b>Δ (95% CI)</b>  | <b>1-Δ</b> |
|----------------------|----------------|----------------------------|-------------------------------|--------------------|------------|
| Large carnivore      | 0.016          | 06:36 a.m.                 | 17:26 p.m.                    | 0.70 (0.55 – 0.84) | 0.30       |
| Large herbivore      | 0.023          | 18:39 p.m.                 | 19:15 p.m.                    | 0.90 (0.85 – 0.95) | 0.10       |
| Large omnivore       | <0.001         | 08:54 a.m.                 | 06:56 a.m.                    | 0.88 (0.87 – 0.90) | 0.12       |
| Medium carnivore     | <0.001         | 21:59 p.m.                 | 18:14 p.m.                    | 0.71 (0.63 – 0.80) | 0.29       |
| Medium herbivore     | <0.001         | 06:36 a.m.                 | 07:15 a.m.                    | 0.85 (0.83 – 0.87) | 0.15       |
| Medium omnivore      | <0.001         | 08:29 a.m.                 | 15:59 p.m.                    | 0.89 (0.87 – 0.91) | 0.11       |
| Small carnivore      | 0.11           | 00:56 a.m.                 | 02:37 a.m.                    | 0.92 (0.87 – 0.96) | 0.08       |
| Small herbivore      | <0.001         | 06:53 a.m.                 | 17:57 p.m.                    | 0.86 (0.84 – 0.89) | 0.14       |
| Small omnivore       | 0.25           | 03:33 a.m.                 | 03:45 a.m.                    | 0.90 (0.85 – 0.95) | 0.10       |

**Supplementary Table 7. Multinomial logit model selection when all species were considered.** “Diel category” refers to species detections found within each diel category (*i.e.*, day, twilight, and night), “disturbance” is the forest landscape integrity index (FLII), “body mass” is the mass of a species in kilograms, “body size” refers the body size categorisations given for each species [*i.e.*, large (>20 kg), medium (4-20 kg), and small (<4 kg)], and “feeding guild” is the typical diet of the species (*i.e.*, carnivore, herbivore, and omnivore). The Akaike Information Criterion (AIC) scores are ordered from the lowest (best models) to highest.

| <b>Model with landscape random effect</b>               | <b>AICc</b> |
|---------------------------------------------------------|-------------|
| Diel category ~ disturbance * body size * feeding guild | 58544.27    |
| Diel category ~ disturbance * body mass * feeding guild | 60424.23    |
| Diel category ~ disturbance + body size + feeding guild | 60485.16    |
| Diel category ~ disturbance * feeding guild             | 60922.70    |
| Diel category ~ feeding guild                           | 61033.14    |
| Diel category ~ disturbance + body mass + feeding guild | 61034.59    |
| Diel category ~ disturbance + feeding guild             | 61036.26    |
| Diel category ~ disturbance * body size                 | 62506.74    |
| Diel category ~ disturbance + body size                 | 63073.59    |
| Diel category ~ body size                               | 63074.39    |
| Diel category ~ disturbance * body mass                 | 63862.25    |
| Diel category ~ disturbance + body mass                 | 64023.00    |
| Diel category ~ disturbance                             | 64025.56    |
| Diel category ~ body mass                               | 64026.72    |
| <b>Model with landscape and species random effect</b>   | <b>AICc</b> |
| Diel category ~ disturbance * body size * feeding guild | 53171.17    |
| Diel category ~ disturbance * body size                 | 53187.87    |
| Diel category ~ disturbance * body mass * feeding guild | 53215.89    |
| Diel category ~ disturbance * body mass                 | 53252.24    |
| Diel category ~ disturbance * feeding guild             | 53301.70    |
| Diel category ~ disturbance + body size                 | 53319.77    |

|                                                         |          |
|---------------------------------------------------------|----------|
| Diel category ~ disturbance                             | 53320.03 |
| Diel category ~ disturbance + body mass                 | 53320.42 |
| Diel category ~ body mass                               | 53324.00 |
| Diel category ~ body size                               | 53325.55 |
| Diel category ~ disturbance + feeding guild             | 53325.95 |
| Diel category ~ disturbance + body size + feeding guild | 53326.67 |
| Diel category ~ disturbance + body mass + feeding guild | 53327.40 |
| Diel category ~ feeding guild                           | 53329.97 |

**Supplementary Table 8. Model summary of the best multinomial logit model when all species were considered.** The “twilight”, “carnivore”, and “small” were treated as the baseline or reference category in our analysis. The standard errors (SE) of coefficient estimates are in parentheses and P-values < 0.05 have an asterisk (\*). Estimates of each model are obtained via the Restricted Maximum Likelihood (REML) method while p-values are estimated using the two-sided likelihood ratio test, however, no further statistical adjustments are made for each comparison.

| <b>Parameter from model with landscape random effect</b>      | <b>Estimates (SE)</b> | <b>Z-value</b> | <b>P-value</b>          |
|---------------------------------------------------------------|-----------------------|----------------|-------------------------|
| Day (vs twilight) ~ (intercept)                               | -0.24 (0.15)          | -1.58          | 0.12                    |
| Night (vs twilight) ~ (intercept)                             | 1.05 (0.13)           | 7.99           | 1.4*10 <sup>-15</sup> * |
| Day (vs twilight) ~ disturbance                               | 0.05 (0.05)           | 1.00           | 0.32                    |
| Night (vs twilight) ~ disturbance                             | -0.08 (0.04)          | -1.86          | 0.064                   |
| Day (vs twilight) ~ body size(large)                          | 0.48 (0.38)           | 1.27           | 0.21                    |
| Night (vs twilight) ~ body size(large)                        | -2.29 (0.51)          | -4.48          | 7.5*10 <sup>-6</sup> *  |
| Day (vs twilight) ~ body size(medium)                         | -0.88 (0.24)          | -3.68          | 2.2*10 <sup>-4</sup> *  |
| Night (vs twilight) ~ body size(medium)                       | -0.49 (0.19)          | -2.57          | 0.010*                  |
| Day (vs twilight) ~ feeding guild(herbivore)                  | 0.23 (0.12)           | 1.87           | 0.061                   |
| Night (vs twilight) ~ feeding guild(herbivore)                | -1.70 (0.11)          | -15.58         | 9.8*10 <sup>-55</sup> * |
| Day (vs twilight) ~ feeding guild(omnivore)                   | -1.67 (0.32)          | -5.18          | 2.3*10 <sup>-7</sup> *  |
| Night (vs twilight) ~ feeding guild(omnivore)                 | 0.46 (0.18)           | 2.54           | 0.011*                  |
| Day (vs twilight) ~ disturbance*body size(large)              | -0.31 (0.18)          | -1.71          | 0.088                   |
| Night (vs twilight) ~ disturbance*body size(large)            | 0.37 (0.16)           | 2.27           | 0.023*                  |
| Day (vs twilight) ~ disturbance*body size(medium)             | 0.20 (0.07)           | 2.97           | 0.0030*                 |
| Night (vs twilight) ~ disturbance*body size(medium)           | -0.05 (0.07)          | -0.66          | 0.51                    |
| Day (vs twilight) ~ disturbance*feeding guild(herbivore)      | -0.13 (0.05)          | -2.61          | 0.010*                  |
| Night (vs twilight) ~ disturbance*feeding guild(herbivore)    | 0.13 (0.04)           | 2.99           | 0.0028*                 |
| Day (vs twilight) ~ disturbance*feeding guild(omnivore)       | 0.12 (0.09)           | 1.37           | 0.17                    |
| Night (vs twilight) ~ disturbance*feeding guild(omnivore)     | -0.11 (0.07)          | -1.68          | 0.093                   |
| Day (vs twilight) ~ body size(large)*feeding guild(herbivore) | -0.83 (0.40)          | -2.08          | 0.037*                  |



|                                                                              |                       |                |                        |
|------------------------------------------------------------------------------|-----------------------|----------------|------------------------|
| Night (vs twilight) ~ body size(large)*feeding guild(herbivore)              | 3.22 (0.52)           | 6.17           | 6.8*10 <sup>-10*</sup> |
| Day (vs twilight) ~ body size(medium)*feeding guild(herbivore)               | 0.99 (0.25)           | 3.98           | 6.8*10 <sup>-5*</sup>  |
| Night (vs twilight) ~ body size(medium)*feeding guild(herbivore)             | 1.29 (0.21)           | 6.31           | 2.8*10 <sup>-10*</sup> |
| Day (vs twilight) ~ body size(large)*feeding guild(omnivore)                 | 2.22 (0.49)           | 4.55           | 5.5*10 <sup>-6*</sup>  |
| Night (vs twilight) ~ body size(large)*feeding guild(omnivore)               | 0.11 (0.54)           | 0.20           | 0.84                   |
| Day (vs twilight) ~ body size(medium)*feeding guild(omnivore)                | 3.84 (0.39)           | 9.89           | 4.5*10 <sup>-23*</sup> |
| Night (vs twilight) ~ body size(medium)*feeding guild(omnivore)              | -2.28 (0.26)          | -8.74          | 2.4*10 <sup>-18*</sup> |
| Day (vs twilight) ~ disturbance*body size(large)*feeding guild(herbivore)    | 0.30 (0.19)           | 1.60           | 0.11                   |
| Night (vs twilight) ~ disturbance*body size(large)*feeding guild(herbivore)  | -0.44 (0.17)          | -2.64          | 0.0083*                |
| Day (vs twilight) ~ disturbance*body size(medium)*feeding guild(herbivore)   | -0.07 (0.07)          | -0.95          | 0.34                   |
| Night (vs twilight) ~ disturbance*body size(medium)*feeding guild(herbivore) | 0.10 (0.08)           | 1.31           | 0.19                   |
| Day (vs twilight) ~ disturbance*body size(large)*feeding guild(omnivore)     | 0.09 (0.20)           | 0.45           | 0.66                   |
| Night (vs twilight) ~ disturbance*body size(large)*feeding guild(omnivore)   | -0.18 (0.17)          | -1.05          | 0.30                   |
| Day (vs twilight) ~ disturbance*body size(medium)*feeding guild(omnivore)    | -0.32 (0.10)          | -3.19          | 0.0014*                |
| Night (vs twilight) ~ disturbance*body size(medium)*feeding guild(omnivore)  | 0.17 (0.09)           | 1.78           | 0.075                  |
| <b>Parameters from model with landscape and species random effect</b>        | <b>Estimates (SE)</b> | <b>Z-value</b> | <b>P-value</b>         |
| Day (vs twilight) ~ (intercept)                                              | -0.47 (0.52)          | -0.91          | 0.36                   |
| Night (vs twilight) ~ (intercept)                                            | -0.08 (0.48)          | -0.17          | 0.86                   |
| Day (vs twilight) ~ disturbance                                              | 0.10 (0.06)           | 1.76           | 0.079                  |
| Night (vs twilight) ~ disturbance                                            | -0.01 (0.05)          | -0.22          | 0.83                   |
| Day (vs twilight) ~ body size(large)                                         | 1.35 (1.29)           | 1.05           | 0.29                   |
| Night (vs twilight) ~ body size(large)                                       | -1.89 (1.28)          | -1.47          | 0.14                   |
| Day (vs twilight) ~ body size(medium)                                        | -0.60 (0.80)          | -0.75          | 0.45                   |
| Night (vs twilight) ~ body size(medium)                                      | -0.15 (0.74)          | -0.20          | 0.84                   |
| Day (vs twilight) ~ feeding guild(herbivore)                                 | -0.50 (0.82)          | -0.61          | 0.54                   |
| Night (vs twilight) ~ feeding guild(herbivore)                               | -0.65 (0.75)          | -0.87          | 0.39                   |
| Day (vs twilight) ~ feeding guild(omnivore)                                  | -0.53 (0.90)          | -0.59          | 0.56                   |
| Night (vs twilight) ~ feeding guild(omnivore)                                | 0.13 (0.84)           | 0.16           | 0.87                   |
| Day (vs twilight) ~ disturbance*body size(large)                             | -0.54 (0.22)          | -2.44          | 0.015*                 |

|                                                                              |              |       |         |
|------------------------------------------------------------------------------|--------------|-------|---------|
| Night (vs twilight) ~ disturbance*body size(large)                           | 0.43 (0.18)  | 2.37  | 0.018*  |
| Day (vs twilight) ~ disturbance*body size(medium)                            | 0.07 (0.10)  | 0.67  | 0.50    |
| Night (vs twilight) ~ disturbance*body size(medium)                          | -0.05 (0.09) | -0.52 | 0.60    |
| Day (vs twilight) ~ disturbance*feeding guild(herbivore)                     | -0.11 (0.06) | -1.85 | 0.064   |
| Night (vs twilight) ~ disturbance*feeding guild(herbivore)                   | 0.10 (0.05)  | 2.00  | 0.046*  |
| Day (vs twilight) ~ disturbance*feeding guild(omnivore)                      | -0.03 (0.11) | -0.23 | 0.81    |
| Night (vs twilight) ~ disturbance*feeding guild(omnivore)                    | -0.11 (0.07) | -1.57 | 0.12    |
| Day (vs twilight) ~ body size(large)*feeding guild(herbivore)                | -0.49 (1.58) | -0.31 | 0.76    |
| Night (vs twilight) ~ body size(large)*feeding guild(herbivore)              | 2.59 (1.53)  | 1.69  | 0.090   |
| Day (vs twilight) ~ body size(medium)*feeding guild(herbivore)               | 1.78 (1.18)  | 1.50  | 0.13    |
| Night (vs twilight) ~ body size(medium)*feeding guild(herbivore)             | 0.40 (1.12)  | 0.36  | 0.72    |
| Day (vs twilight) ~ body size(large)*feeding guild(omnivore)                 | -0.09 (1.68) | -0.05 | 0.96    |
| Night (vs twilight) ~ body size(large)*feeding guild(omnivore)               | 1.43 (1.62)  | 0.88  | 0.38    |
| Day (vs twilight) ~ body size(medium)*feeding guild(omnivore)                | 1.37 (1.23)  | 1.11  | 0.27    |
| Night (vs twilight) ~ body size(medium)*feeding guild(omnivore)              | 0.20 (1.14)  | 0.17  | 0.86    |
| Day (vs twilight) ~ disturbance*body size(large)*feeding guild(herbivore)    | 0.50 (0.22)  | 2.23  | 0.026*  |
| Night (vs twilight) ~ disturbance*body size(large)*feeding guild(herbivore)  | -0.54 (0.19) | -2.94 | 0.0033* |
| Day (vs twilight) ~ disturbance*body size(medium)*feeding guild(herbivore)   | 0.04 (0.10)  | 0.42  | 0.68    |
| Night (vs twilight) ~ disturbance*body size(medium)*feeding guild(herbivore) | -0.09 (0.09) | -1.01 | 0.31    |
| Day (vs twilight) ~ disturbance*body size(large)*feeding guild(omnivore)     | 0.39 (0.24)  | 1.61  | 0.11    |
| Night (vs twilight) ~ disturbance*body size(large)*feeding guild(omnivore)   | -0.28 (0.19) | -1.46 | 0.14    |
| Day (vs twilight) ~ disturbance*body size(medium)*feeding guild(omnivore)    | -0.10 (0.14) | -0.75 | 0.46    |
| Night (vs twilight) ~ disturbance*body size(medium)*feeding guild(omnivore)  | 0.19 (0.11)  | 1.77  | 0.077   |

**Supplementary Table 9.** Multinomial logit model selection when only the 59 rarer specialists were considered. “Diel category” refers to species detections found within each diel category (*i.e.*, day, twilight, and night), “disturbance” is the inverse of the forest landscape integrity index (FLII), “body mass” is the mass of a species in kilograms, “body size” refers the body size categorisations given for each species [*i.e.*, large (>20 kg), medium (4-20 kg), and small (<4 kg)], and “feeding guild” is the typical diet of the species (*i.e.*, carnivore, herbivore, and omnivore).

| <b>Model with landscape random effect</b>               | <b>AICc</b> |
|---------------------------------------------------------|-------------|
| Diel category ~ disturbance * body size * feeding guild | 30676.86    |
| Diel category ~ disturbance * body mass * feeding guild | 31110.40    |
| Diel category ~ disturbance + body size + feeding guild | 31305.85    |
| Diel category ~ disturbance * feeding guild             | 31314.29    |
| Diel category ~ disturbance + feeding guild             | 31408.01    |
| Diel category ~ feeding guild                           | 31408.08    |
| Diel category ~ disturbance + body mass + feeding guild | 31411.99    |
| Diel category ~ disturbance * body size                 | 31653.50    |
| Diel category ~ body size                               | 31673.61    |
| Diel category ~ disturbance + body size                 | 31674.61    |
| Diel category ~ disturbance * body mass                 | 31731.84    |
| Diel category ~ disturbance                             | 31746.84    |
| Diel category ~ body mass                               | 31749.15    |
| Diel category ~ disturbance + body mass                 | 31750.06    |
| <b>Model with landscape and species random effect</b>   | <b>AICc</b> |
| Diel category ~ disturbance * body size                 | 25949.77    |
| Diel category ~ disturbance * body mass * feeding guild | 25951.36    |
| Diel category ~ disturbance * body mass                 | 25952.07    |
| Diel category ~ disturbance * body size * feeding guild | 25953.44    |
| Diel category ~ disturbance                             | 25959.26    |
| Diel category ~ feeding guild                           | 25963.06    |
| Diel category ~ body mass                               | 25963.10    |

|                                                         |          |
|---------------------------------------------------------|----------|
| Diel category ~ disturbance + body mass                 | 25963.18 |
| Diel category ~ body size                               | 25963.56 |
| Diel category ~ disturbance * feeding guild             | 25965.21 |
| Diel category ~ disturbance + feeding guild             | 25965.62 |
| Diel category ~ disturbance + body size                 | 25968.13 |
| Diel category ~ disturbance + body mass + feeding guild | 25968.33 |
| Diel category ~ disturbance + body size + feeding guild | 25969.18 |

**Supplementary Table 10. Multinomial logit model summary testing for the effect of disturbance on the 59 rarer specialist species (excluding pigs and macaques) with only landscape considered as the random effect.** The model selection showed the top model included a three-way interaction between disturbance, body size, and feeding guild (Table S9). The “twilight”, “carnivore”, and “small” were treated as the baseline or reference categories. Standard errors shown in parentheses and asterisks (\*) denote significance ( $P < 0.05$ ). Estimates of each model are obtained via the Restricted Maximum Likelihood (REML) method while p-values are estimated using the two-sided likelihood ratio test, however, no further statistical adjustments are made for each comparison.

| Parameter                                                  | Estimates    | Z-value | P-value                 |
|------------------------------------------------------------|--------------|---------|-------------------------|
| Day (vs twilight) ~ (Intercept)                            | -0.24 (0.16) | -1.54   | 0.12                    |
| Night (vs twilight) ~ (Intercept)                          | 1.07 (0.14)  | 7.45    | 9.3*10 <sup>-14</sup> * |
| Day (vs twilight) ~ disturbance                            | 0.04 (0.05)  | 0.88    | 0.38                    |
| Night (vs twilight) ~ disturbance                          | -0.08 (0.04) | -1.83   | 0.067                   |
| Day (vs twilight) ~ body size(large)                       | 0.65 (0.38)  | 1.70    | 0.089                   |
| Night (vs twilight) ~ body size(large)                     | -2.36 (0.51) | -4.62   | 3.8*10 <sup>-6</sup> *  |
| Day (vs twilight) ~ body size(medium)                      | -0.96 (0.24) | -3.98   | 6.9*10 <sup>-5</sup> *  |
| Night (vs twilight) ~ body size(medium)                    | -0.46 (0.19) | -2.43   | 0.015*                  |
| Day (vs twilight) ~ feeding guild(herbivore)               | 0.23 (0.12)  | 1.89    | 0.059                   |
| Night (vs twilight) ~ feeding guild(herbivore)             | -1.69 (0.11) | -15.50  | 3.4*10 <sup>-54</sup> * |
| Day (vs twilight) ~ feeding guild(omnivore)                | -1.97 (0.33) | -5.92   | 3.2*10 <sup>-9</sup> *  |
| Night (vs twilight) ~ feeding guild(omnivore)              | 0.62 (0.18)  | 3.35    | 8.1*10 <sup>-4</sup> *  |
| Day (vs twilight) ~ disturbance*body size(large)           | -0.36 (0.18) | -1.95   | 0.051                   |
| Night (vs twilight) ~ disturbance*body size(large)         | 0.39 (0.16)  | 2.40    | 0.017*                  |
| Day (vs twilight) ~ disturbance*body size(medium)          | 0.25 (0.07)  | 3.57    | 3.5*10 <sup>-4</sup> *  |
| Night (vs twilight) ~ disturbance*body size(medium)        | -0.08 (0.07) | -1.10   | 0.27                    |
| Day (vs twilight) ~ disturbance*feeding guild(herbivore)   | -0.11 (0.05) | -2.30   | 0.022*                  |
| Night (vs twilight) ~ disturbance*feeding guild(herbivore) | 0.11 (0.04)  | 2.57    | 0.010*                  |
| Day (vs twilight) ~ disturbance*feeding guild(omnivore)    | 0.19 (0.09)  | 2.09    | 0.037*                  |
| Night (vs twilight) ~ disturbance*feeding guild(omnivore)  | -0.14 (0.07) | -2.06   | 0.039*                  |

|                                                                              |              |       |                         |
|------------------------------------------------------------------------------|--------------|-------|-------------------------|
| Day (vs twilight) ~ body size(large)*feeding guild(herbivore)                | -0.95 (0.40) | -2.38 | 0.017*                  |
| Night (vs twilight) ~ body size(large)*feeding guild(herbivore)              | 3.25 (0.52)  | 6.25  | 4.2*10 <sup>-10</sup> * |
| Day (vs twilight) ~ body size(medium)*feeding guild(herbivore)               | 1.11 (0.25)  | 4.42  | 1.0*10 <sup>-7</sup> *  |
| Night (vs twilight) ~ body size(medium)*feeding guild(herbivore)             | 1.25 (0.21)  | 6.07  | 1.3*10 <sup>-9</sup> *  |
| Day (vs twilight) ~ body size(large)*feeding guild(omnivore)                 | 1.40 (0.52)  | 2.69  | 0.0071*                 |
| Night (vs twilight) ~ body size(large)*feeding guild(omnivore)               | 0.64 (0.56)  | 1.14  | 0.25                    |
| Day (vs twilight) ~ body size(medium)*feeding guild(omnivore)                | 3.59 (0.45)  | 8.01  | 1.2*10 <sup>-15</sup> * |
| Night (vs twilight) ~ body size(medium)*feeding guild(omnivore)              | -0.10 (0.31) | -0.33 | 0.75                    |
| Day (vs twilight) ~ disturbance*body size(large)*feeding guild(herbivore)    | 0.33 (0.19)  | 1.73  | 0.084                   |
| Night (vs twilight) ~ disturbance*body size(large)*feeding guild(herbivore)  | -0.43 (0.17) | -2.58 | 0.010*                  |
| Day (vs twilight) ~ disturbance*body size(medium)*feeding guild(herbivore)   | -0.15 (0.08) | -2.03 | 0.042*                  |
| Night (vs twilight) ~ disturbance*body size(medium)*feeding guild(herbivore) | 0.14 (0.08)  | 1.82  | 0.068                   |
| Day (vs twilight) ~ disturbance*body size(large)*feeding guild(omnivore)     | 0.17 (0.21)  | 0.81  | 0.42                    |
| Night (vs twilight) ~ disturbance*body size(large)*feeding guild(omnivore)   | -0.16 (0.18) | -0.88 | 0.38                    |
| Day (vs twilight) ~ disturbance*body size(medium)*feeding guild(omnivore)    | -0.71 (0.15) | -4.64 | 3.4*10 <sup>-6</sup> *  |
| Night (vs twilight) ~ disturbance*body size(medium)*feeding guild(omnivore)  | 0.19 (0.12)  | 1.59  | 0.11                    |

**Supplementary Table 11. Multinomial logit model summary testing for the effect of disturbance on the 59 rarer specialist species (excluding pigs and macaques) while including both landscape and species-level random effect.** The model selection showed the top model included a two-way interaction between disturbance and body size but not feeding guild (Table S9). The “twilight” and “small” were treated as the baseline or reference categories. Standard errors shown in parentheses and asterisks (\*) denote significance ( $P < 0.05$ ). Estimates of each model are obtained via the Restricted Maximum Likelihood (REML) method while p-values are estimated using the two-sided likelihood ratio test, however, no further statistical adjustments are made for each comparison.

| Parameter                                           | Estimates | Z-value | P-value |
|-----------------------------------------------------|-----------|---------|---------|
| Day (vs twilight) ~ (Intercept)                     | -0.54     | -1.58   | 0.11    |
| Night (vs twilight) ~ (Intercept)                   | -0.42     | -1.35   | 0.18    |
| Day (vs twilight) ~ disturbance                     | -0.02     | -0.82   | 0.41    |
| Night (vs twilight) ~ disturbance                   | 0.06      | 3.02    | 0.0025* |
| Day (vs twilight) ~ body size(large)                | 0.49      | 0.84    | 0.40    |
| Night (vs twilight) ~ body size(large)              | 0.27      | 0.50    | 0.62    |
| Day (vs twilight) ~ body size(medium)               | 0.28      | 0.59    | 0.56    |
| Night (vs twilight) ~ body size(medium)             | 0.39      | 0.89    | 0.38    |
| Day (vs twilight) ~ disturbance*body size(large)    | -0.06     | -1.54   | 0.12    |
| Night (vs twilight) ~ disturbance*body size(large)  | -0.02     | -0.67   | 0.51    |
| Day (vs twilight) ~ disturbance*body size(medium)   | 0.04      | 1.48    | 0.14    |
| Night (vs twilight) ~ disturbance*body size(medium) | -0.09     | -3.17   | 0.0015* |

**Supplementary Table 12. Multinomial logit model summary testing for the net effect of disturbance on all species.** The “twilight” category was treated as the baseline or reference category in our analyses. Standard errors shown in parentheses and asterisks (\*) denote significance ( $P < 0.05$ ). Estimates of each model are obtained via the Restricted Maximum Likelihood (REML) method while p-values are estimated using the two-sided likelihood ratio test, however, no further statistical adjustments are made for each comparison.

| <b>Parameters from models with landscape random effect</b>             | <b>Estimates</b> | <b>Z-value</b> | <b>P-value</b>         |
|------------------------------------------------------------------------|------------------|----------------|------------------------|
| Day (vs twilight) ~ (Intercept)                                        | 0.45 (0.07)      | 6.19           | 6.0*10 <sup>-10*</sup> |
| Night (vs twilight) ~ (Intercept)                                      | -0.20 (0.14)     | -1.50          | 0.13                   |
| Day (vs twilight) ~ disturbance                                        | 0.01 (0.01)      | 1.29           | 0.20                   |
| Night (vs twilight) ~ disturbance                                      | -0.02 (0.01)     | -1.61          | 0.11                   |
| <b>Parameters from models with landscape and species random effect</b> | <b>Estimates</b> | <b>Z-value</b> | <b>P-value</b>         |
| Day (vs twilight) ~ (Intercept)                                        | -0.28 (0.22)     | -1.25          | 0.21                   |
| Night (vs twilight) ~ (Intercept)                                      | -0.34 (0.20)     | -1.77          | 0.077                  |
| Day (vs twilight) ~ disturbance                                        | -0.01 (0.01)     | -1.15          | 0.25                   |
| Night (vs twilight) ~ disturbance                                      | 0.03 (0.01)      | 2.35           | 0.019*                 |



**Supplementary Table 13. Multinomial logit model summary testing for the net effect of disturbance on the 59 rarer specialists.** The “twilight” category was treated as the baseline or reference category in our analyses. Standard errors shown in parentheses and asterisks (\*) denote significance ( $P < 0.05$ ). Estimates of each model are obtained via the Restricted Maximum Likelihood (REML) method while p-values are estimated using the two-sided likelihood ratio test, however, no further statistical adjustments are made for each comparison.

| <b>Parameters from models with landscape random effect</b>             | <b>Estimates</b> | <b>Z-value</b> | <b>P-value</b> |
|------------------------------------------------------------------------|------------------|----------------|----------------|
| Day (vs twilight) ~ (Intercept)                                        | -0.06 (0.10)     | -0.56          | 0.58           |
| Night (vs twilight) ~ (Intercept)                                      | 0.16 (0.12)      | 1.34           | 0.18           |
| Day (vs twilight) ~ disturbance                                        | -0.03 (0.02)     | -1.59          | 0.11           |
| Night (vs twilight) ~ disturbance                                      | 0.002 (0.02)     | 0.11           | 0.91           |
| <b>Parameters from models with landscape and species random effect</b> | <b>Estimates</b> | <b>Z-value</b> | <b>P-value</b> |
| Day (vs twilight) ~ (Intercept)                                        | -0.35 (0.22)     | -1.54          | 0.12           |
| Night (vs twilight) ~ (Intercept)                                      | -0.23 (0.21)     | -1.08          | 0.28           |
| Day (vs twilight) ~ disturbance                                        | -0.008 (0.02)    | -0.47          | 0.64           |
| Night (vs twilight) ~ disturbance                                      | 0.03 (0.02)      | 1.75           | 0.080          |

**Supplementary Table 14. Multinomial logit model summary testing for the net effect of disturbance on the four common pigs and macaques.** The “twilight” category was treated as the baseline or reference category in our analyses. Standard errors shown in parentheses and asterisks (\*) denote significance ( $P < 0.05$ ). Estimates of each model are obtained via the Restricted Maximum Likelihood (REML) method while p-values are estimated using the two-sided likelihood ratio test, however, no further statistical adjustments are made for each comparison.

| <b>Parameters from models with landscape random effect</b>             | <b>Estimates</b> | <b>Z-value</b> | <b>P-value</b>          |
|------------------------------------------------------------------------|------------------|----------------|-------------------------|
| Day (vs twilight) ~ (Intercept)                                        | 0.96 (0.10)      | 9.30           | $1.5 \times 10^{-20}$ * |
| Night (vs twilight) ~ (Intercept)                                      | -1.28 (0.20)     | -6.37          | $1.8 \times 10^{-10}$ * |
| Day (vs twilight) ~ disturbance                                        | -0.02 (0.01)     | -1.64          | 0.10                    |
| Night (vs twilight) ~ disturbance                                      | 0.02 (0.02)      | 1.26           | 0.21                    |
| <b>Parameters from models with landscape and species random effect</b> | <b>Estimates</b> | <b>Z-value</b> | <b>P-value</b>          |
| Day (vs twilight) ~ (Intercept)                                        | 1.03 (0.25)      | 4.22           | $2.5 \times 10^{-5}$ *  |
| Night (vs twilight) ~ (Intercept)                                      | -1.48 (0.35)     | -4.23          | $2.3 \times 10^{-5}$ *  |
| Day (vs twilight) ~ disturbance                                        | -0.01 (0.01)     | -1.29          | 0.20                    |
| Night (vs twilight) ~ disturbance                                      | 0.01 (0.02)      | 0.77           | 0.44                    |

**Supplementary Table 15. Binomial logit model summary testing for community-level wildlife behaviour shifts in response to disturbance (inverse FLII).** These models compare the likelihood of detections occurring during the named period (left side of ~) versus detections occurring during any other period (compared to multinomial models that primarily compare against the reference category). In practice, for example, multinomial compares likelihood of detections during day vs twilight while the binomial below compares day versus either twilight or night. Both landscape and species were treated as the random effects. Standard errors are shown in parentheses and asterisks (\*) denote significance ( $P < 0.05$ ). Estimates of each model are obtained via the Restricted Maximum Likelihood (REML) method while p-values are estimated using the two-sided likelihood ratio test, however, no further statistical adjustments are made for each comparison.

| Parameters                  | Estimates    | Z-value | P-value                 |
|-----------------------------|--------------|---------|-------------------------|
| <b>All species</b>          |              |         |                         |
| Day ~ (Intercept)           | -1.02 (0.31) | -3.30   | 0.0010*                 |
| Day ~ disturbance           | -0.02 (0.01) | -1.91   | 0.056                   |
| Night ~ (Intercept)         | -1.07 (0.28) | -3.85   | $1.2 \times 10^{-4}$ *  |
| Night ~ disturbance         | 0.03 (0.01)  | 2.71    | 0.0068*                 |
| Twilight ~ (Intercept)      | -1.04 (0.11) | -9.62   | $6.8 \times 10^{-22}$ * |
| Twilight ~ disturbance      | 0.003 (0.1)  | 0.33    | 0.74                    |
| <b>Rarer 59 specialists</b> |              |         |                         |
| Day ~ (Intercept)           | -1.13 (0.33) | -3.44   | $5.8 \times 10^{-4}$ *  |
| Day ~ disturbance           | -0.02 (0.02) | -0.89   | 0.37                    |
| Night ~ (Intercept)         | -0.93 (0.30) | -3.13   | 0.0017*                 |
| Night ~ disturbance         | 0.03 (0.02)  | 1.96    | 0.049*                  |
| Twilight ~ (Intercept)      | -1.03 (0.11) | -9.38   | $6.6 \times 10^{-21}$ * |
| Twilight ~ disturbance      | -0.01 (0.01) | -1.10   | 0.27                    |
| <b>4 Pigs and macaques</b>  |              |         |                         |
| Day ~ (Intercept)           | 0.79 (0.26)  | 3.05    | 0.0023*                 |
| Day ~ disturbance           | -0.02 (0.01) | -1.53   | 0.12                    |

|                        |              |       |                         |
|------------------------|--------------|-------|-------------------------|
| Night ~ (Intercept)    | -2.81 (0.43) | -6.46 | $1.1 \times 10^{-10}$ * |
| Night ~ disturbance    | 0.02 (0.02)  | 1.35  | 0.18                    |
| Twilight ~ (Intercept) | -1.16 (0.19) | -6.24 | $4.4 \times 10^{-10}$ * |
| Twilight ~ disturbance | 0.01 (0.01)  | 1.11  | 0.27                    |

**Supplementary Table 16. Multinomial logit model summaries of guild-level responses to disturbance, with only landscape treated as random effects (no consideration of species-specific detections).** The “twilight” was treated as the baseline or reference category. Standard errors shown in parentheses and asterisks (\*) denote significance ( $P < 0.05$ ). Estimates of each model are obtained via the Restricted Maximum Likelihood (REML) method while p-values are estimated using the two-sided likelihood ratio test, however, no further statistical adjustments are made for each comparison.

| <b>Trophic guild</b> | <b>Diel category</b>              | <b>Estimates (SE)</b> | <b>Z-value</b> | <b>P-value</b>          |
|----------------------|-----------------------------------|-----------------------|----------------|-------------------------|
| Large carnivore      | Day (vs twilight) ~ (intercept)   | 0.89 (0.61)           | 1.46           | 0.14                    |
|                      | Night (vs twilight) ~ (intercept) | -1.77 (0.68)          | -2.61          | 0.0090*                 |
|                      | Day (vs twilight) ~ disturbance   | -0.53 (0.22)          | -2.39          | 0.017*                  |
|                      | Night (vs twilight) ~ disturbance | 0.42 (0.18)           | 2.36           | 0.018*                  |
| Large herbivore      | Day (vs twilight) ~ (intercept)   | -0.34 (0.15)          | -2.23          | 0.026*                  |
|                      | Night (vs twilight) ~ (intercept) | 0.02 (0.17)           | 0.09           | 0.93                    |
|                      | Day (vs twilight) ~ disturbance   | -0.10 (0.05)          | -1.95          | 0.051                   |
|                      | Night (vs twilight) ~ disturbance | 0.02 (0.04)           | 0.38           | 0.70                    |
| Large omnivore       | Day (vs twilight) ~ (intercept)   | 0.70 (0.22)           | 3.24           | 0.0012*                 |
|                      | Night (vs twilight) ~ (intercept) | -0.67 (0.22)          | -3.06          | 0.0022*                 |
|                      | Day (vs twilight) ~ disturbance   | -0.11 (0.02)          | -7.01          | $2.3 \times 10^{-12}$ * |
|                      | Night (vs twilight) ~ disturbance | -0.01 (0.02)          | -0.40          | 0.69                    |
| Medium carnivore     | Day (vs twilight) ~ (intercept)   | -1.09 (0.40)          | -2.72          | 0.0066*                 |
|                      | Night (vs twilight) ~ (intercept) | -0.03 (0.39)          | -0.09          | 0.93                    |
|                      | Day (vs twilight) ~ disturbance   | 0.23 (0.08)           | 2.72           | 0.0066*                 |
|                      | Night (vs twilight) ~ disturbance | -0.01 (0.09)          | -0.13          | 0.90                    |
| Medium herbivore     | Day (vs twilight) ~ (intercept)   | 0.22 (0.16)           | 1.37           | 0.17                    |
|                      | Night (vs twilight) ~ (intercept) | 0.45 (0.15)           | 3.05           | 0.0023*                 |
|                      | Day (vs twilight) ~ disturbance   | -0.02 (0.03)          | -0.68          | 0.50                    |

|                 |                                   |              |        |                        |
|-----------------|-----------------------------------|--------------|--------|------------------------|
|                 | Night (vs twilight) ~ disturbance | 0.03 (0.03)  | 1.01   | 0.31                   |
| Medium omnivore | Day (vs twilight) ~ (intercept)   | 1.00 (0.16)  | 6.34   | 2.4*10 <sup>-10*</sup> |
|                 | Night (vs twilight) ~ (intercept) | -1.59 (0.15) | -10.91 | 1.1*10 <sup>-27*</sup> |
|                 | Day (vs twilight) ~ disturbance   | 0.09 (0.02)  | 5.21   | 1.9*10 <sup>-7*</sup>  |
|                 | Night (vs twilight) ~ disturbance | 0.01 (0.03)  | 0.32   | 0.75                   |
| Small carnivore | Day (vs twilight) ~ (intercept)   | -0.11 (0.18) | -0.60  | 0.55                   |
|                 | Night (vs twilight) ~ (intercept) | 0.71 (0.18)  | 4.05   | 5.1*10 <sup>-5*</sup>  |
|                 | Day (vs twilight) ~ disturbance   | 0.02 (0.06)  | 0.33   | 0.74                   |
|                 | Night (vs twilight) ~ disturbance | -0.02 (0.05) | -0.47  | 0.64                   |
| Small herbivore | Day (vs twilight) ~ (intercept)   | -0.61 (0.25) | -2.43  | 0.015*                 |
|                 | Night (vs twilight) ~ (intercept) | -0.60 (0.30) | -2.01  | 0.044*                 |
|                 | Day (vs twilight) ~ disturbance   | 0.04 (0.03)  | 1.48   | 0.14                   |
|                 | Night (vs twilight) ~ disturbance | 0.01 (0.03)  | 0.43   | 0.66                   |
| Small omnivore  | Day (vs twilight) ~ (intercept)   | -1.30 (0.51) | -2.55  | 0.011*                 |
|                 | Night (vs twilight) ~ (intercept) | 1.38 (0.28)  | 4.94   | 7.9*10 <sup>-7*</sup>  |
|                 | Day (vs twilight) ~ disturbance   | 0.04 (0.11)  | 0.40   | 0.69                   |
|                 | Night (vs twilight) ~ disturbance | -0.19 (0.07) | -2.73  | 0.0064                 |

**Supplementary Table 17. Multinomial logit model summaries of guild-level responses to disturbance, with both landscape and species were treated as random effects. Interpretations same as before.**

| <b>Trophic guild</b> | <b>Diel category</b>              | <b>Estimates (SE)</b> | <b>Z-value</b> | <b>P-value</b>          |
|----------------------|-----------------------------------|-----------------------|----------------|-------------------------|
| Large carnivore      | Day (vs twilight) ~ (intercept)   | 0.95 (0.72)           | 1.32           | 0.19                    |
|                      | Night (vs twilight) ~ (intercept) | -1.92 (0.77)          | -2.51          | 0.012*                  |
|                      | Day (vs twilight) ~ disturbance   | -0.51 (0.21)          | -2.41          | 0.016*                  |
|                      | Night (vs twilight) ~ disturbance | 0.43 (0.18)           | 2.42           | 0.016*                  |
| Large herbivore      | Day (vs twilight) ~ (intercept)   | -0.22 (0.42)          | -0.53          | 0.60                    |
|                      | Night (vs twilight) ~ (intercept) | -0.06 (0.38)          | -0.16          | 0.87                    |
|                      | Day (vs twilight) ~ disturbance   | -0.04 (0.05)          | -0.72          | 0.47                    |
|                      | Night (vs twilight) ~ disturbance | 0.01 (0.05)           | 0.24           | 0.81                    |
| Large omnivore       | Day (vs twilight) ~ (intercept)   | 0.35 (0.36)           | 0.98           | 0.33                    |
|                      | Night (vs twilight) ~ (intercept) | -0.43 (0.46)          | -0.94          | 0.35                    |
|                      | Day (vs twilight) ~ disturbance   | -0.12 (0.02)          | -7.71          | 1.3*10 <sup>-14</sup> * |
|                      | Night (vs twilight) ~ disturbance | -0.01 (0.02)          | -0.52          | 0.61                    |
| Medium carnivore     | Day (vs twilight) ~ (intercept)   | -0.79 (0.64)          | -1.22          | 0.22                    |
|                      | Night (vs twilight) ~ (intercept) | -0.51 (0.51)          | -0.99          | 0.32                    |
|                      | Day (vs twilight) ~ disturbance   | 0.11 (0.09)           | 1.26           | 0.21                    |
|                      | Night (vs twilight) ~ disturbance | 0.03 (0.09)           | 0.33           | 0.74                    |
| Medium herbivore     | Day (vs twilight) ~ (intercept)   | 0.56 (0.74)           | 0.76           | 0.45                    |
|                      | Night (vs twilight) ~ (intercept) | -0.66 (0.69)          | -0.95          | 0.34                    |
|                      | Day (vs twilight) ~ disturbance   | 0.0005 (0.03)         | 0.02           | 0.99                    |
|                      | Night (vs twilight) ~ disturbance | -0.02 (0.03)          | -0.77          | 0.44                    |
| Medium omnivore      | Day (vs twilight) ~ (intercept)   | -0.44 (0.67)          | -0.65          | 0.51                    |
|                      | Night (vs twilight) ~ (intercept) | 0.08 (0.61)           | 0.13           | 0.89                    |
|                      | Day (vs twilight) ~ disturbance   | 0.08 (0.02)           | 4.95           | 7.6*10 <sup>-7</sup> *  |
|                      | Night (vs twilight) ~ disturbance | 0.03 (0.03)           | 0.86           | 0.39                    |
| Small carnivore      | Day (vs twilight) ~ (intercept)   | -0.39 (0.57)          | -0.68          | 0.50                    |

|                 |                                   |                |       |         |
|-----------------|-----------------------------------|----------------|-------|---------|
|                 | Night (vs twilight) ~ (intercept) | -0.13 (0.45)   | -0.29 | 0.77    |
|                 | Day (vs twilight) ~ disturbance   | 0.07 (0.06)    | 1.26  | 0.21    |
|                 | Night (vs twilight) ~ disturbance | -0.0003 (0.05) | -0.08 | 0.94    |
| Small herbivore | Day (vs twilight) ~ (intercept)   | -1.02 (0.63)   | -1.62 | 0.11    |
|                 | Night (vs twilight) ~ (intercept) | -0.68 (0.77)   | -0.88 | 0.38    |
|                 | Day (vs twilight) ~ disturbance   | 0.03 (0.03)    | 1.00  | 0.32    |
|                 | Night (vs twilight) ~ disturbance | 0.08 (0.03)    | 2.69  | 0.0072* |
| Small omnivore  | Day (vs twilight) ~ (intercept)   | -1.03 (0.96)   | -1.08 | 0.28    |
|                 | Night (vs twilight) ~ (intercept) | -0.25 (1.07)   | -0.24 | 0.81    |
|                 | Day (vs twilight) ~ disturbance   | 0.11 (0.10)    | 1.05  | 0.29    |
|                 | Night (vs twilight) ~ disturbance | -0.14 (0.05)   | -2.50 | 0.012*  |



**Supplementary Table 18. Model summaries for species-level multinomial logit models. All models were fitted by treating species detections found within each diel category (i.e., “day”, “Twilight”, and “Night) as the response variable and disturbance as the independent variable.** We modelled and plotted FLII in decreasing order to showcase the effects of increasing disturbance on wildlife behaviour. We also included landscapes that we surveyed as a random effect in each model to account for non-independence. The “day” category was treated as the baseline or reference category in our analyses. Standard errors shown in parentheses and asterisks (\*) denote significance ( $P < 0.05$ ). Estimates of each model are obtained via the Restricted Maximum Likelihood (REML) method while p-values are estimated using the two-sided likelihood ratio test, however, no further statistical adjustments are made for each comparison.

| Species                                                   | Diel category                     | Estimates (SE) | Z-value | P-value                 |
|-----------------------------------------------------------|-----------------------------------|----------------|---------|-------------------------|
| Asian elephant ( <i>Elephas maximus</i> )                 | Day (vs twilight) ~ (intercept)   | 0.42 (0.55)    | 0.77    | 0.44                    |
|                                                           | Night (vs twilight) ~ (intercept) | 0.08 (0.45)    | 0.18    | 0.86                    |
|                                                           | Day (vs twilight) ~ disturbance   | -0.64 (0.51)   | -1.25   | 0.21                    |
|                                                           | Night (vs twilight) ~ disturbance | -0.23 (0.41)   | -0.57   | 0.57                    |
| Banded civet ( <i>Hemigalus derbyanus</i> )               | Day (vs twilight) ~ (intercept)   | -1.56 (0.31)   | -5.02   | 5.1*10 <sup>-7</sup> *  |
|                                                           | Night (vs twilight) ~ (intercept) | 1.43 (0.15)    | 9.34    | 9.5*10 <sup>-21</sup> * |
|                                                           | Day (vs twilight) ~ disturbance   | 0.31 (0.16)    | 2.01    | 0.044*                  |
|                                                           | Night (vs twilight) ~ disturbance | 0.07 (0.11)    | 0.60    | 0.55                    |
| Bearded pig ( <i>Sus barbatus</i> )                       | Day (vs twilight) ~ (intercept)   | 0.60 (0.51)    | 1.17    | 0.24                    |
|                                                           | Night (vs twilight) ~ (intercept) | -1.23 (0.43)   | -2.83   | 0.0046                  |
|                                                           | Day (vs twilight) ~ disturbance   | -0.26 (0.03)   | -7.41   | 1.2*10 <sup>-13</sup> * |
|                                                           | Night (vs twilight) ~ disturbance | 0.05 (0.06)    | 0.83    | 0.40                    |
| Common long-tailed macaque ( <i>Macaca fascicularis</i> ) | Day (vs twilight) ~ (intercept)   | 3.08 (0.59)    | 5.24    | 1.6*10 <sup>-7</sup> *  |
|                                                           | Night (vs twilight) ~ (intercept) | -1.74 (1.09)   | -1.60   | 0.11                    |
|                                                           | Day (vs twilight) ~ disturbance   | -0.21 (0.08)   | -2.79   | 0.0053*                 |
|                                                           | Night (vs twilight) ~ disturbance | 0.02 (0.14)    | 0.12    | 0.90                    |

|                                                 |                                   |              |       |                        |
|-------------------------------------------------|-----------------------------------|--------------|-------|------------------------|
| Great argus ( <i>Argusianus argus</i> )         | Day (vs twilight) ~ (intercept)   | 0.73 (0.09)  | 8.35  | 6.9*10 <sup>-17*</sup> |
|                                                 | Night (vs twilight) ~ (intercept) | -2.41 (0.26) | -9.21 | 3.4*10 <sup>-20*</sup> |
|                                                 | Day (vs twilight) ~ disturbance   | -0.04 (0.04) | -1.04 | 0.30                   |
|                                                 | Night (vs twilight) ~ disturbance | -0.29 (0.29) | -1.02 | 0.31                   |
| Leopard cat ( <i>Prionailurus bengalensis</i> ) | Day (vs twilight) ~ (intercept)   | -1.48 (0.33) | -4.47 | 7.8*10 <sup>-6*</sup>  |
|                                                 | Night (vs twilight) ~ (intercept) | 0.52 (0.22)  | 2.38  | 0.017*                 |
|                                                 | Day (vs twilight) ~ disturbance   | 0.11 (0.10)  | 1.13  | 0.26                   |
|                                                 | Night (vs twilight) ~ disturbance | -0.01 (0.07) | -0.14 | 0.89                   |
| Malay tapir ( <i>Tapirus indicus</i> )          | Day (vs twilight) ~ (intercept)   | -1.40 (0.25) | -5.54 | 3.0*10 <sup>-8*</sup>  |
|                                                 | Night (vs twilight) ~ (intercept) | 0.48 (0.14)  | 3.45  | 5.7*10 <sup>-4*</sup>  |
|                                                 | Day (vs twilight) ~ disturbance   | -0.07 (0.08) | -0.86 | 0.39                   |
|                                                 | Night (vs twilight) ~ disturbance | -0.03 (0.04) | -0.74 | 0.46                   |
| Malayan porcupine ( <i>Hystrix brachyura</i> )  | Day (vs twilight) ~ (intercept)   | -2.96 (0.34) | -8.71 | 3.0*10 <sup>-18*</sup> |
|                                                 | Night (vs twilight) ~ (intercept) | 1.55 (0.09)  | 17.29 | 5.9*10 <sup>-67*</sup> |
|                                                 | Day (vs twilight) ~ disturbance   | 0.12 (0.10)  | 1.21  | 0.22                   |
|                                                 | Night (vs twilight) ~ disturbance | 0.004 (0.03) | 0.13  | 0.90                   |
| Mouse deer ( <i>Tragulus spp.</i> )             | Day (vs twilight) ~ (intercept)   | -1.01 (0.22) | -4.50 | 6.7*10 <sup>-6*</sup>  |
|                                                 | Night (vs twilight) ~ (intercept) | -1.04 (0.27) | -3.80 | 1.5*10 <sup>-4*</sup>  |
|                                                 | Day (vs twilight) ~ disturbance   | 0.06 (0.03)  | 1.86  | 0.062                  |
|                                                 | Night (vs twilight) ~ disturbance | 0.10 (0.03)  | 2.97  | 0.0029*                |
| Sambar deer ( <i>Rusa unicolor</i> )            | Day (vs twilight) ~ (intercept)   | -0.34 (0.23) | -1.50 | 0.13                   |
|                                                 | Night (vs twilight) ~ (intercept) | -0.05 (0.26) | -0.20 | 0.84                   |
|                                                 | Day (vs twilight) ~ disturbance   | -0.02 (0.07) | -0.23 | 0.82                   |
|                                                 | Night (vs twilight) ~ disturbance | -0.02 (0.07) | -0.25 | 0.81                   |
| Pig-tailed macaque ( <i>Macaca nemestrina</i> ) | Day (vs twilight) ~ (intercept)   | 0.99 (0.20)  | 5.04  | 4.6*10 <sup>-7*</sup>  |
|                                                 | Night (vs twilight) ~ (intercept) | -2.78 (0.34) | -8.14 | 4.0*10 <sup>-16*</sup> |
|                                                 | Day (vs twilight) ~ disturbance   | 0.10 (0.02)  | 5.79  | 7.2*10 <sup>-9*</sup>  |
|                                                 | Night (vs twilight) ~ disturbance | 0.05 (0.04)  | 1.15  | 0.25                   |
| Red muntjac ( <i>Muntiacus muntjac</i> )        | Day (vs twilight) ~ (intercept)   | 0.61 (0.14)  | 4.36  | 1.3*10 <sup>-5*</sup>  |

|                                         |                                   |               |       |                        |
|-----------------------------------------|-----------------------------------|---------------|-------|------------------------|
|                                         | Night (vs twilight) ~ (intercept) | -0.82 (0.16)  | -5.01 | 5.5*10 <sup>-7</sup> * |
|                                         | Day (vs twilight) ~ disturbance   | 0.0005 (0.03) | 0.02  | 0.99                   |
|                                         | Night (vs twilight) ~ disturbance | -0.04 (0.04)  | -0.92 | 0.36                   |
| Sun bear ( <i>Helarctos malayanus</i> ) | Day (vs twilight) ~ (intercept)   | -0.05 (0.26)  | -0.20 | 0.84                   |
|                                         | Night (vs twilight) ~ (intercept) | -0.48 (0.35)  | -1.36 | 0.17                   |
|                                         | Day (vs twilight) ~ disturbance   | -0.07 (0.08)  | -0.95 | 0.34                   |
|                                         | Night (vs twilight) ~ disturbance | 0.12 (0.08)   | 1.53  | 0.13                   |
| Tiger ( <i>Panthera tigris</i> )        | Day (vs twilight) ~ (intercept)   | 0.64 (0.57)   | 1.13  | 0.26                   |
|                                         | Night (vs twilight) ~ (intercept) | -1.77 (0.60)  | -2.98 | 0.0029*                |
|                                         | Day (vs twilight) ~ disturbance   | -0.67 (0.32)  | -2.10 | 0.036*                 |
|                                         | Night (vs twilight) ~ disturbance | 0.53 (0.21)   | 2.48  | 0.013*                 |
| Wild boar ( <i>Sus scrofa</i> )         | Day (vs twilight) ~ (intercept)   | 0.82 (0.16)   | 4.99  | 6.0*10 <sup>-7</sup> * |
|                                         | Night (vs twilight) ~ (intercept) | -0.66 (0.26)  | -2.55 | 0.011*                 |
|                                         | Day (vs twilight) ~ disturbance   | -0.07 (0.02)  | -4.39 | 1.1*10 <sup>-5</sup> * |
|                                         | Night (vs twilight) ~ disturbance | -0.02 (0.02)  | -0.86 | 0.39                   |

**Supplementary Table 19. Species-level temporal outputs using kernel density estimation.** ‘AP<sub>Intact</sub>’ and ‘AP<sub>Disturbed</sub>’ signifies the activity peaks at intact (FLII > 8.77) and disturbed (FLII ≤ 8.77) sites respectively. P-values are estimated using the two-sided compareCkern test, however, no further statistical adjustments were made for each comparison (Note that the compareCkern function outputs “0” when P < 0.001, which we report here as “P < 0.001”). ‘Δ (95% CI)’ represents the estimated overlap coefficients and their associated 95% confidence interval. ‘1 - Δ’ is the change in temporal overlap between intact and disturbed forests for a given species.

| Common name                    | Species name                      | P-value | AP <sub>Intact</sub> | AP <sub>Disturbed</sub> | Δ (95% CI)         | 1-Δ  |
|--------------------------------|-----------------------------------|---------|----------------------|-------------------------|--------------------|------|
| Asiatic brush-tailed porcupine | <i>Atherurus macrourus</i>        | 0.49    | 03:47 a.m.           | 02:03 a.m.              | 0.88 (0.80 – 0.95) | 0.12 |
| Banded civet                   | <i>Hemigalus derbyanus</i>        | 0.75    | 02:57 a.m.           | 00:50 a.m.              | 0.91 (0.84 – 0.98) | 0.09 |
| Banded linsang                 | <i>Prionodon linsang</i>          | 0.11    | 04:38 a.m.           | 03:36 a.m.              | 0.72 (0.57 – 0.86) | 0.28 |
| Bearded pig                    | <i>Sus barbatus</i>               | <0.001  | 14:45 p.m.           | 17:12 p.m.              | 0.78 (0.73 – 0.83) | 0.22 |
| Bornean porcupine              | <i>Hystrix crassispinis</i>       | 0.47    | 22:27 p.m.           | 21:36 p.m.              | 0.88 (0.78 – 0.98) | 0.12 |
| Clouded leopard                | <i>Neofelis spp.</i>              | 0.008   | 22:07 p.m.           | 06:00 a.m.              | 0.72 (0.57 – 0.86) | 0.28 |
| Common palm civet              | <i>Paradoxurus hermaphroditus</i> | 0.094   | 19:38 p.m.           | 18:56 p.m.              | 0.84 (0.76 – 0.92) | 0.16 |
| Crested fireback pheasant      | <i>Lophura spp.</i>               | 0.49    | 07:55 a.m.           | 08:23 a.m.              | 0.91 (0.86 – 0.97) | 0.11 |
| Great argus                    | <i>Argusianus argus</i>           | <0.001  | 07:38 a.m.           | 06:56 a.m.              | 0.77 (0.68 – 0.86) | 0.23 |
| Leopard cat                    | <i>Prionailurus spp.</i>          | 0.019   | 05:17 a.m.           | 00:33 a.m.              | 0.84 (0.76 – 0.92) | 0.16 |
| Long-tailed porcupine          | <i>Trichys fasciculata</i>        | 0.48    | 01:38 a.m.           | 20:09 p.m.              | 0.80 (0.65 – 0.95) | 0.20 |
| Malay tapir                    | <i>Tapirus indicus</i>            | 0.50    | 19:13 p.m.           | 19:38 p.m.              | 0.91 (0.84 – 0.98) | 0.09 |
| Malayan porcupine              | <i>Hystrix brachyura</i>          | 0.31    | 01:52 a.m.           | 03:36 a.m.              | 0.95 (0.92 – 0.97) | 0.05 |
| Masked palm civet              | <i>Paguma larvata</i>             | 0.80    | 20:12 p.m.           | 04:44 a.m.              | 0.86 (0.74 – 0.99) | 0.14 |
| Moon rat                       | <i>Echinosorex gymnura</i>        | 0.98    | 02:57 a.m.           | 02:51 a.m.              | 0.95 (0.89 – 1.01) | 0.05 |
| Mouse deer                     | <i>Tragulus spp.</i>              | <0.001  | 06:14 a.m.           | 18:02 p.m.              | 0.89 (0.85 – 0.92) | 0.11 |
| Sambar deer                    | <i>Rusa unicolor</i>              | 0.21    | 06:16 a.m.           | 18:42 p.m.              | 0.89 (0.83 – 0.96) | 0.11 |
| Southern pig-tailed macaque    | <i>Macaca nemestrina</i>          | <0.001  | 08:23 a.m.           | 15:59 p.m.              | 0.87 (0.85 – 0.90) | 0.13 |
| Southern red muntjac           | <i>Muntiacus muntjak</i>          | <0.001  | 06:33 a.m.           | 07:18 a.m.              | 0.91 (0.89 – 0.94) | 0.09 |
| Sun bear                       | <i>Helarctos malayanus</i>        | 0.47    | 17:31 p.m.           | 17:43 p.m.              | 0.90 (0.84 – 0.96) | 0.10 |
| Tiger                          | <i>Panthera tigris</i>            | 0.002   | 06:36 a.m.           | 17:45 p.m.              | 0.63 (0.46 – 0.79) | 0.37 |

|                        |                         |        |            |            |                    |      |
|------------------------|-------------------------|--------|------------|------------|--------------------|------|
| Wild boar              | <i>Sus scrofa</i>       | <0.001 | 09:11 a.m. | 06:53 a.m. | 0.88 (0.86 – 0.90) | 0.12 |
| Yellow-throated marten | <i>Martes flavigula</i> | 0.70   | 14:37 p.m. | 06:59 a.m. | 0.87 (0.76 – 0.97) | 0.13 |

**Supplementary Table 20. Estimated overlap coefficients ( $\Delta$ ) and their associated 95% confidence intervals (CI) between potential competitors in both intact ( $FLII > 8.77$ ) and disturbed ( $FLII \leq 8.77$ ) sites across Southeast Asia. “\*” refers to species pairs that are likely having a competitive interaction even though they have different body size categorisations (Refer to Methods section 2.7).**

| First species                | Second species                    | Status    | Competition type    | $\Delta$ (95% CI)    |
|------------------------------|-----------------------------------|-----------|---------------------|----------------------|
| <i>Argusianus argus</i>      | <i>Atherurus macrourus</i>        | Disturbed | herbivore-herbivore | 0.13 (0.059 – 0.20)  |
| <i>Argusianus argus</i>      | <i>Atherurus macrourus</i>        | Intact    | herbivore-herbivore | 0.097 (0.061 – 0.13) |
| <i>Argusianus argus</i>      | <i>Lophura spp.</i>               | Disturbed | herbivore-herbivore | 0.83 (0.76 – 0.90)   |
| <i>Argusianus argus</i>      | <i>Lophura spp.</i>               | Intact    | herbivore-herbivore | 0.79 (0.72 – 0.87)   |
| <i>Argusianus argus</i>      | <i>Tragulus spp.</i>              | Disturbed | herbivore-herbivore | 0.60 (0.53 – 0.67)   |
| <i>Argusianus argus</i>      | <i>Tragulus spp.</i>              | Intact    | herbivore-herbivore | 0.58 (0.55 – 0.62)   |
| <i>Argusianus argus</i>      | <i>Trichys fasciculata</i>        | Disturbed | herbivore-herbivore | 0.13 (0.051 – 0.20)  |
| <i>Argusianus argus</i>      | <i>Trichys fasciculata</i>        | Intact    | herbivore-herbivore | 0.097 (0.013 – 0.18) |
| * <i>Atherurus macrourus</i> | * <i>Hystrix brachyura</i>        | Disturbed | herbivore-herbivore | 0.89 (0.82 – 0.95)   |
| * <i>Atherurus macrourus</i> | * <i>Hystrix brachyura</i>        | Intact    | herbivore-herbivore | 0.95 (0.91 – 0.99)   |
| <i>Atherurus macrourus</i>   | <i>Lophura spp.</i>               | Disturbed | herbivore-herbivore | 0.080 (0.030 – 0.13) |
| <i>Atherurus macrourus</i>   | <i>Lophura spp.</i>               | Intact    | herbivore-herbivore | 0.079 (0.034 – 0.12) |
| <i>Atherurus macrourus</i>   | <i>Tragulus spp.</i>              | Disturbed | herbivore-herbivore | 0.43 (0.36 – 0.49)   |
| <i>Atherurus macrourus</i>   | <i>Tragulus spp.</i>              | Intact    | herbivore-herbivore | 0.35 (0.31 – 0.40)   |
| <i>Atherurus macrourus</i>   | <i>Trichys fasciculata</i>        | Disturbed | herbivore-herbivore | 0.73 (0.62 – 0.85)   |
| <i>Atherurus macrourus</i>   | <i>Trichys fasciculata</i>        | Intact    | herbivore-herbivore | 0.87 (0.76 – 0.99)   |
| <i>Echinosorex gymnura</i>   | <i>Paradoxurus hermaphroditus</i> | Disturbed | omnivore-omnivore   | 0.72 (0.64 – 0.81)   |
| <i>Echinosorex gymnura</i>   | <i>Paradoxurus hermaphroditus</i> | Intact    | omnivore-omnivore   | 0.83 (0.74 – 0.93)   |
| <i>Helarctos malayanus</i>   | <i>Sus barbatus</i>               | Disturbed | omnivore-omnivore   | 0.73 (0.66 – 0.79)   |
| <i>Helarctos malayanus</i>   | <i>Sus barbatus</i>               | Intact    | omnivore-omnivore   | 0.71 (0.65 – 0.78)   |
| <i>Helarctos malayanus</i>   | <i>Sus scrofa</i>                 | Disturbed | omnivore-omnivore   | 0.75 (0.68 – 0.81)   |
| <i>Helarctos malayanus</i>   | <i>Sus scrofa</i>                 | Intact    | omnivore-omnivore   | 0.67 (0.61 – 0.72)   |
| <i>Hemigalus derbyanus</i>   | <i>Martes flavigula</i>           | Disturbed | carnivore-carnivore | 0.26 (0.15 – 0.37)   |
| <i>Hemigalus derbyanus</i>   | <i>Martes flavigula</i>           | Intact    | carnivore-carnivore | 0.17 (0.10 – 0.23)   |

|                               |                              |           |                     |                        |
|-------------------------------|------------------------------|-----------|---------------------|------------------------|
| <i>Hemigalus derbyanus</i>    | <i>Prionailurus spp.</i>     | Disturbed | carnivore-carnivore | 0.83 (0.74 – 0.93)     |
| <i>Hemigalus derbyanus</i>    | <i>Prionailurus spp.</i>     | Intact    | carnivore-carnivore | 0.82 (0.76 – 0.89)     |
| <i>Hemigalus derbyanus</i>    | <i>Prionodon linsang</i>     | Disturbed | carnivore-carnivore | 0.83 (0.72 – 0.95)     |
| <i>Hemigalus derbyanus</i>    | <i>Prionodon linsang</i>     | Intact    | carnivore-carnivore | 0.70 (0.56 – 0.84)     |
| <i>Hystrix brachyura</i>      | <i>Hystrix crassispinis</i>  | Disturbed | herbivore-herbivore | 0.90 (0.82 – 0.97)     |
| <i>Hystrix brachyura</i>      | <i>Hystrix crassispinis</i>  | Intact    | herbivore-herbivore | 0.82 (0.73 – 0.91)     |
| <i>Hystrix brachyura</i>      | <i>Muntiacus muntjak</i>     | Disturbed | herbivore-herbivore | 0.25 (0.22 – 0.28)     |
| <i>Hystrix brachyura</i>      | <i>Muntiacus muntjak</i>     | Intact    | herbivore-herbivore | 0.29 (0.27 – 0.31)     |
| * <i>Hystrix brachyura</i>    | * <i>Trichys fasciculata</i> | Disturbed | herbivore-herbivore | 0.83 (0.75 – 0.92)     |
| * <i>Hystrix brachyura</i>    | * <i>Trichys fasciculata</i> | Intact    | herbivore-herbivore | 0.90 (0.79 – 1.01)     |
| <i>Hystrix crassispinis</i>   | <i>Muntiacus muntjak</i>     | Disturbed | herbivore-herbivore | 0.26 (0.21 – 0.32)     |
| <i>Hystrix crassispinis</i>   | <i>Muntiacus muntjak</i>     | Intact    | herbivore-herbivore | 0.34 (0.25 – 0.43)     |
| * <i>Hystrix crassispinis</i> | * <i>Trichys fasciculata</i> | Disturbed | herbivore-herbivore | 0.85 (0.75 – 0.94)     |
| * <i>Hystrix crassispinis</i> | * <i>Trichys fasciculata</i> | Intact    | herbivore-herbivore | 0.83 (0.68 – 0.99)     |
| <i>Lophura spp.</i>           | <i>Tragulus spp.</i>         | Disturbed | herbivore-herbivore | 0.50 (0.45 – 0.54)     |
| <i>Lophura spp.</i>           | <i>Tragulus spp.</i>         | Intact    | herbivore-herbivore | 0.60 (0.54 – 0.65)     |
| <i>Lophura spp.</i>           | <i>Trichys fasciculata</i>   | Disturbed | herbivore-herbivore | 0.13 (0.067 – 0.19)    |
| <i>Lophura spp.</i>           | <i>Trichys fasciculata</i>   | Intact    | herbivore-herbivore | 0.085 (-0.0076 – 0.18) |
| <i>Macaca nemestrina</i>      | <i>Paguma larvata</i>        | Disturbed | omnivore-omnivore   | 0.19 (0.12 – 0.27)     |
| <i>Macaca nemestrina</i>      | <i>Paguma larvata</i>        | Intact    | omnivore-omnivore   | 0.20 (0.11 – 0.29)     |
| <i>Martes flavigula</i>       | <i>Prionailurus spp.</i>     | Disturbed | carnivore-carnivore | 0.41 (0.30 – 0.52)     |
| <i>Martes flavigula</i>       | <i>Prionailurus spp.</i>     | Intact    | carnivore-carnivore | 0.27 (0.19 – 0.35)     |
| <i>Martes flavigula</i>       | <i>Prionodon linsang</i>     | Disturbed | carnivore-carnivore | 0.17 (0.063 – 0.28)    |
| <i>Martes flavigula</i>       | <i>Prionodon linsang</i>     | Intact    | carnivore-carnivore | 0.20 (0.097 – 0.31)    |
| * <i>Muntiacus muntjak</i>    | * <i>Rusa unicolor</i>       | Disturbed | herbivore-herbivore | 0.66 (0.59 – 0.73)     |
| * <i>Muntiacus muntjak</i>    | * <i>Rusa unicolor</i>       | Intact    | herbivore-herbivore | 0.81 (0.76 – 0.85)     |
| * <i>Muntiacus muntjak</i>    | * <i>Tapirus indicus</i>     | Disturbed | herbivore-herbivore | 0.47 (0.41 – 0.53)     |
| * <i>Muntiacus muntjak</i>    | * <i>Tapirus indicus</i>     | Intact    | herbivore-herbivore | 0.49 (0.44 – 0.54)     |
| * <i>Muntiacus muntjak</i>    | * <i>Tragulus spp.</i>       | Disturbed | herbivore-herbivore | 0.71 (0.67 – 0.74)     |
| * <i>Muntiacus muntjak</i>    | * <i>Tragulus spp.</i>       | Intact    | herbivore-herbivore | 0.81 (0.79 – 0.84)     |

|                          |                            |           |                     |                    |
|--------------------------|----------------------------|-----------|---------------------|--------------------|
| <i>*Neofelis spp.</i>    | <i>*Panthera tigris</i>    | Disturbed | carnivore-carnivore | 0.64 (0.48 – 0.80) |
| <i>*Neofelis spp.</i>    | <i>*Panthera tigris</i>    | Intact    | carnivore-carnivore | 0.44 (0.30 – 0.58) |
| <i>Prionailurus spp.</i> | <i>Prionodon linsang</i>   | Disturbed | carnivore-carnivore | 0.69 (0.57 – 0.81) |
| <i>Prionailurus spp.</i> | <i>Prionodon linsang</i>   | Intact    | carnivore-carnivore | 0.78 (0.65 – 0.91) |
| <i>Rusa unicolor</i>     | <i>Tapirus indicus</i>     | Disturbed | herbivore-herbivore | 0.80 (0.72 – 0.88) |
| <i>Rusa unicolor</i>     | <i>Tapirus indicus</i>     | Intact    | herbivore-herbivore | 0.69 (0.62 – 0.76) |
| <i>*Rusa unicolor</i>    | <i>*Tragulus spp.</i>      | Disturbed | herbivore-herbivore | 0.82 (0.76 – 0.87) |
| <i>*Rusa unicolor</i>    | <i>*Tragulus spp.</i>      | Intact    | herbivore-herbivore | 0.82 (0.77 – 0.87) |
| <i>Sus barbatus</i>      | <i>Sus scrofa</i>          | Disturbed | omnivore-omnivore   | 0.82 (0.79 – 0.85) |
| <i>Sus barbatus</i>      | <i>Sus scrofa</i>          | Intact    | omnivore-omnivore   | 0.90 (0.86 – 0.94) |
| <i>*Tapirus indicus</i>  | <i>*Tragulus spp.</i>      | Disturbed | herbivore-herbivore | 0.69 (0.62 – 0.75) |
| <i>*Tapirus indicus</i>  | <i>*Tragulus spp.</i>      | Intact    | herbivore-herbivore | 0.59 (0.54 – 0.65) |
| <i>Tragulus spp.</i>     | <i>Trichys fasciculata</i> | Disturbed | herbivore-herbivore | 0.49 (0.41 – 0.56) |
| <i>Tragulus spp.</i>     | <i>Trichys fasciculata</i> | Intact    | herbivore-herbivore | 0.33 (0.21 – 0.44) |



**Supplementary Table 21. Mann-Whitney U test outputs at the guild-level for potential competitors between intact (FLII > 8.77) and disturbed (FLII ≤ 8.77) forests.** ‘N’ refers to the number of species pairs used for the analysis. We also note that the statistical tests used are two-sided and no further statistical adjustments were conducted for each pairwise comparisons.

| <b>Competition type</b> | <b>N<sub>Disturbed</sub></b> | <b>N<sub>Intact</sub></b> | <b>Mean<sub>Intact</sub> (95% CI)</b> | <b>Mean<sub>Disturbed</sub> (95% CI)</b> | <b>U-statistics</b> | <b>P-value</b> |
|-------------------------|------------------------------|---------------------------|---------------------------------------|------------------------------------------|---------------------|----------------|
| carnivore-carnivore     | 7                            | 7                         | 0.48 (0.29 – 0.70)                    | 0.55 (0.35 – 0.72)                       | 4                   | 0.11           |
| herbivore-herbivore     | 22                           | 22                        | 0.56 (0.43 – 0.68)                    | 0.55 (0.43 – 0.66)                       | 125                 | 0.97           |
| omnivore-omnivore       | 5                            | 5                         | 0.66 (0.43 – 0.84)                    | 0.64 (0.41 – 0.78)                       | 9                   | 0.81           |

**Supplementary Table 22. Estimated overlap coefficients ( $\Delta$ ) and their associated 95% confidence intervals (CI) between potential predators and prey in both intact (FLII > 8.77) and disturbed (FLII  $\leq$  8.77) sites across Southeast Asia. Species pairs involving clouded leopards (*Neofelis spp.*) are given exceptions (“\*”) as the species is able to predate upon other species with a larger body size category than itself (Refer to Methods section 2.7).**

| First species              | Second species             | Status    | Predation type      | $\Delta$ (95% CI)   |
|----------------------------|----------------------------|-----------|---------------------|---------------------|
| <i>Argusianus argus</i>    | <i>Hemigalus derbyanus</i> | Disturbed | carnivore-herbivore | 0.21 (0.11 – 0.30)  |
| <i>Argusianus argus</i>    | <i>Hemigalus derbyanus</i> | Intact    | carnivore-herbivore | 0.14 (0.10 – 0.17)  |
| <i>Argusianus argus</i>    | <i>Martes flavigula</i>    | Disturbed | carnivore-herbivore | 0.91 (0.82 – 0.99)  |
| <i>Argusianus argus</i>    | <i>Martes flavigula</i>    | Intact    | carnivore-herbivore | 0.75 (0.65 – 0.84)  |
| <i>Argusianus argus</i>    | <i>Neofelis spp.</i>       | Disturbed | carnivore-herbivore | 0.39 (0.28 – 0.51)  |
| <i>Argusianus argus</i>    | <i>Neofelis spp.</i>       | Intact    | carnivore-herbivore | 0.26 (0.18 – 0.34)  |
| <i>Argusianus argus</i>    | <i>Panthera tigris</i>     | Disturbed | carnivore-herbivore | 0.54 (0.39 – 0.68)  |
| <i>Argusianus argus</i>    | <i>Panthera tigris</i>     | Intact    | carnivore-herbivore | 0.72 (0.61 – 0.83)  |
| <i>Argusianus argus</i>    | <i>Prionailurus spp.</i>   | Disturbed | carnivore-herbivore | 0.37 (0.27 – 0.46)  |
| <i>Argusianus argus</i>    | <i>Prionailurus spp.</i>   | Intact    | carnivore-herbivore | 0.26 (0.20 – 0.31)  |
| <i>Argusianus argus</i>    | <i>Prionodon linsang</i>   | Disturbed | carnivore-herbivore | 0.13 (0.045 – 0.22) |
| <i>Argusianus argus</i>    | <i>Prionodon linsang</i>   | Intact    | carnivore-herbivore | 0.20 (0.10 – 0.29)  |
| <i>Atherurus macrourus</i> | <i>Hemigalus derbyanus</i> | Disturbed | carnivore-herbivore | 0.84 (0.75 – 0.93)  |
| <i>Atherurus macrourus</i> | <i>Hemigalus derbyanus</i> | Intact    | carnivore-herbivore | 0.92 (0.87 – 0.98)  |
| <i>Atherurus macrourus</i> | <i>Martes flavigula</i>    | Disturbed | carnivore-herbivore | 0.17 (0.078 – 0.26) |
| <i>Atherurus macrourus</i> | <i>Martes flavigula</i>    | Intact    | carnivore-herbivore | 0.13 (0.063 – 0.19) |
| <i>Atherurus macrourus</i> | <i>Neofelis spp.</i>       | Disturbed | carnivore-herbivore | 0.64 (0.50 – 0.76)  |
| <i>Atherurus macrourus</i> | <i>Neofelis spp.</i>       | Intact    | carnivore-herbivore | 0.84 (0.76 – 0.91)  |

|                              |                            |           |                     |                     |
|------------------------------|----------------------------|-----------|---------------------|---------------------|
| <i>Atherurus macrourus</i>   | <i>Panthera tigris</i>     | Disturbed | carnivore-herbivore | 0.53 (0.38 – 0.67)  |
| <i>Atherurus macrourus</i>   | <i>Panthera tigris</i>     | Intact    | carnivore-herbivore | 0.29 (0.16 – 0.41)  |
| <i>Atherurus macrourus</i>   | <i>Prionailurus spp.</i>   | Disturbed | carnivore-herbivore | 0.70 (0.60 – 0.79)  |
| <i>Atherurus macrourus</i>   | <i>Prionailurus spp.</i>   | Intact    | carnivore-herbivore | 0.81 (0.75 – 0.88)  |
| <i>Atherurus macrourus</i>   | <i>Prionodon linsang</i>   | Disturbed | carnivore-herbivore | 0.79 (0.66 – 0.92)  |
| <i>Atherurus macrourus</i>   | <i>Prionodon linsang</i>   | Intact    | carnivore-herbivore | 0.73 (0.59 – 0.86)  |
| <i>Echinosorex gymnura</i>   | <i>Hemigalus derbyanus</i> | Disturbed | carnivore-omnivore  | 0.87 (0.79 – 0.95)  |
| <i>Echinosorex gymnura</i>   | <i>Hemigalus derbyanus</i> | Intact    | carnivore-omnivore  | 0.87 (0.80 – 0.94)  |
| <i>Echinosorex gymnura</i>   | <i>Martes flavigula</i>    | Disturbed | carnivore-omnivore  | 0.15 (0.069 – 0.24) |
| <i>Echinosorex gymnura</i>   | <i>Martes flavigula</i>    | Intact    | carnivore-omnivore  | 0.11 (0.043 – 0.17) |
| <i>Echinosorex gymnura</i>   | <i>Neofelis spp.</i>       | Disturbed | carnivore-omnivore  | 0.63 (0.50 – 0.76)  |
| <i>Echinosorex gymnura</i>   | <i>Neofelis spp.</i>       | Intact    | carnivore-omnivore  | 0.77 (0.69 – 0.86)  |
| <i>Echinosorex gymnura</i>   | <i>Panthera tigris</i>     | Disturbed | carnivore-omnivore  | 0.52 (0.38 – 0.66)  |
| <i>Echinosorex gymnura</i>   | <i>Panthera tigris</i>     | Intact    | carnivore-omnivore  | 0.26 (0.14 – 0.39)  |
| <i>Echinosorex gymnura</i>   | <i>Prionailurus spp.</i>   | Disturbed | carnivore-omnivore  | 0.71 (0.62 – 0.79)  |
| <i>Echinosorex gymnura</i>   | <i>Prionailurus spp.</i>   | Intact    | carnivore-omnivore  | 0.76 (0.69 – 0.83)  |
| <i>Echinosorex gymnura</i>   | <i>Prionodon linsang</i>   | Disturbed | carnivore-omnivore  | 0.86 (0.74 – 0.98)  |
| <i>Echinosorex gymnura</i>   | <i>Prionodon linsang</i>   | Intact    | carnivore-omnivore  | 0.69 (0.56 – 0.83)  |
| * <i>Helarctos malayanus</i> | * <i>Neofelis spp.</i>     | Disturbed | carnivore-omnivore  | 0.60 (0.48 – 0.72)  |
| * <i>Helarctos malayanus</i> | * <i>Neofelis spp.</i>     | Intact    | carnivore-omnivore  | 0.62 (0.53 – 0.72)  |
| <i>Helarctos malayanus</i>   | <i>Panthera tigris</i>     | Disturbed | carnivore-omnivore  | 0.75 (0.62 – 0.88)  |
| <i>Helarctos malayanus</i>   | <i>Panthera tigris</i>     | Intact    | carnivore-omnivore  | 0.69 (0.56 – 0.81)  |
| <i>Hemigalus derbyanus</i>   | <i>Lophura spp.</i>        | Disturbed | carnivore-herbivore | 0.18 (0.10 – 0.25)  |
| <i>Hemigalus derbyanus</i>   | <i>Lophura spp.</i>        | Intact    | carnivore-herbivore | 0.13 (0.083 – 0.17) |
| <i>Hemigalus derbyanus</i>   | <i>Neofelis spp.</i>       | Disturbed | carnivore-carnivore | 0.68 (0.54 – 0.82)  |
| <i>Hemigalus derbyanus</i>   | <i>Neofelis spp.</i>       | Intact    | carnivore-carnivore | 0.85 (0.78 – 0.93)  |

|                             |                                   |           |                     |                     |
|-----------------------------|-----------------------------------|-----------|---------------------|---------------------|
| <i>Hemigalus derbyanus</i>  | <i>Panthera tigris</i>            | Disturbed | carnivore-carnivore | 0.65 (0.51 – 0.79)  |
| <i>Hemigalus derbyanus</i>  | <i>Panthera tigris</i>            | Intact    | carnivore-carnivore | 0.32 (0.19 – 0.44)  |
| <i>Hemigalus derbyanus</i>  | <i>Paradoxurus hermaphroditus</i> | Disturbed | carnivore-carnivore | 0.80 (0.71 – 0.89)  |
| <i>Hemigalus derbyanus</i>  | <i>Paradoxurus hermaphroditus</i> | Intact    | carnivore-carnivore | 0.86 (0.76 – 0.93)  |
| <i>Hemigalus derbyanus</i>  | <i>Tragulus spp.</i>              | Disturbed | carnivore-carnivore | 0.53 (0.45 – 0.62)  |
| <i>Hemigalus derbyanus</i>  | <i>Tragulus spp.</i>              | Intact    | carnivore-carnivore | 0.40 (0.35 – 0.44)  |
| <i>Hemigalus derbyanus</i>  | <i>Trichys fasciculata</i>        | Disturbed | carnivore-herbivore | 0.82 (0.71 – 0.93)  |
| <i>Hemigalus derbyanus</i>  | <i>Trichys fasciculata</i>        | Intact    | carnivore-herbivore | 0.89 (0.77 – 1.00)  |
| <i>Hystrix brachyura</i>    | <i>Neofelis spp.</i>              | Disturbed | carnivore-herbivore | 0.64 (0.51 – 0.77)  |
| <i>Hystrix brachyura</i>    | <i>Neofelis spp.</i>              | Intact    | carnivore-herbivore | 0.83 (0.76 – 0.90)  |
| <i>Hystrix brachyura</i>    | <i>Panthera tigris</i>            | Disturbed | carnivore-herbivore | 0.55 (0.42 – 0.68)  |
| <i>Hystrix brachyura</i>    | <i>Panthera tigris</i>            | Intact    | carnivore-herbivore | 0.27 (0.15 – 0.39)  |
| <i>Hystrix crassispinis</i> | <i>Neofelis spp.</i>              | Disturbed | carnivore-herbivore | 0.59 (0.45 – 0.74)  |
| <i>Hystrix crassispinis</i> | <i>Neofelis spp.</i>              | Intact    | carnivore-herbivore | 0.80 (0.68 – 0.92)  |
| <i>Lophura spp.</i>         | <i>Martes flavigula</i>           | Disturbed | carnivore-herbivore | 0.80 (0.71 – 0.89)  |
| <i>Lophura spp.</i>         | <i>Martes flavigula</i>           | Intact    | carnivore-herbivore | 0.80 (0.71 – 0.89)  |
| <i>Lophura spp.</i>         | <i>Neofelis spp.</i>              | Disturbed | carnivore-herbivore | 0.26 (0.16 – 0.36)  |
| <i>Lophura spp.</i>         | <i>Neofelis spp.</i>              | Intact    | carnivore-herbivore | 0.25 (0.16 – 0.33)  |
| <i>Lophura spp.</i>         | <i>Panthera tigris</i>            | Disturbed | carnivore-herbivore | 0.48 (0.34 – 0.62)  |
| <i>Lophura spp.</i>         | <i>Panthera tigris</i>            | Intact    | carnivore-herbivore | 0.70 (0.58 – 0.82)  |
| <i>Lophura spp.</i>         | <i>Prionailurus spp.</i>          | Disturbed | carnivore-herbivore | 0.32 (0.24 – 0.40)  |
| <i>Lophura spp.</i>         | <i>Prionailurus spp.</i>          | Intact    | carnivore-herbivore | 0.25 (0.19 – 0.32)  |
| <i>Lophura spp.</i>         | <i>Prionodon linsang</i>          | Disturbed | carnivore-herbivore | 0.10 (0.026 – 0.17) |
| <i>Lophura spp.</i>         | <i>Prionodon linsang</i>          | Intact    | carnivore-herbivore | 0.19 (0.087 – 0.29) |
| <i>Macaca nemestrina</i>    | <i>Neofelis spp.</i>              | Disturbed | carnivore-omnivore  | 0.35 (0.26 – 0.44)  |
| <i>Macaca nemestrina</i>    | <i>Neofelis spp.</i>              | Intact    | carnivore-omnivore  | 0.22 (0.15 – 0.30)  |

|                          |                                   |           |                     |                     |
|--------------------------|-----------------------------------|-----------|---------------------|---------------------|
| <i>Macaca nemestrina</i> | <i>Panthera tigris</i>            | Disturbed | carnivore-omnivore  | 0.53 (0.39 – 0.66)  |
| <i>Macaca nemestrina</i> | <i>Panthera tigris</i>            | Intact    | carnivore-omnivore  | 0.66 (0.54 – 0.79)  |
| <i>Martes flavigula</i>  | <i>Neofelis spp.</i>              | Disturbed | carnivore-carnivore | 0.43 (0.30 – 0.56)  |
| <i>Martes flavigula</i>  | <i>Neofelis spp.</i>              | Intact    | carnivore-carnivore | 0.27 (0.17 – 0.37)  |
| <i>Martes flavigula</i>  | <i>Panthera tigris</i>            | Disturbed | carnivore-carnivore | 0.55 (0.40 – 0.70)  |
| <i>Martes flavigula</i>  | <i>Panthera tigris</i>            | Intact    | carnivore-carnivore | 0.69 (0.55 – 0.83)  |
| <i>Martes flavigula</i>  | <i>Paradoxurus hermaphroditus</i> | Disturbed | carnivore-omnivore  | 0.27 (0.17 – 0.37)  |
| <i>Martes flavigula</i>  | <i>Paradoxurus hermaphroditus</i> | Intact    | carnivore-omnivore  | 0.14 (0.068 – 0.21) |
| <i>Martes flavigula</i>  | <i>Tragulus spp.</i>              | Disturbed | carnivore-herbivore | 0.60 (0.51 – 0.69)  |
| <i>Martes flavigula</i>  | <i>Tragulus spp.</i>              | Intact    | carnivore-herbivore | 0.56 (0.48 – 0.64)  |
| <i>Martes flavigula</i>  | <i>Trichys fasciculata</i>        | Disturbed | carnivore-herbivore | 0.18 (0.080 – 0.27) |
| <i>Martes flavigula</i>  | <i>Trichys fasciculata</i>        | Intact    | carnivore-herbivore | 0.11 (0.012 – 0.21) |
| <i>Muntiacus muntjak</i> | <i>Neofelis spp.</i>              | Disturbed | carnivore-herbivore | 0.51 (0.40 – 0.61)  |
| <i>Muntiacus muntjak</i> | <i>Neofelis spp.</i>              | Intact    | carnivore-herbivore | 0.46 (0.38 – 0.55)  |
| <i>Muntiacus muntjak</i> | <i>Panthera tigris</i>            | Disturbed | carnivore-herbivore | 0.66 (0.54 – 0.79)  |
| <i>Muntiacus muntjak</i> | <i>Panthera tigris</i>            | Intact    | carnivore-herbivore | 0.82 (0.73 – 0.91)  |
| <i>Neofelis spp.</i>     | <i>Paguma larvata</i>             | Disturbed | carnivore-omnivore  | 0.76 (0.62 – 0.91)  |
| <i>Neofelis spp.</i>     | <i>Paguma larvata</i>             | Intact    | carnivore-omnivore  | 0.87 (0.76 – 0.98)  |
| <i>Neofelis spp.</i>     | <i>Paradoxurus hermaphroditus</i> | Disturbed | carnivore-omnivore  | 0.71 (0.59 – 0.83)  |
| <i>Neofelis spp.</i>     | <i>Paradoxurus hermaphroditus</i> | Intact    | carnivore-omnivore  | 0.82 (0.73 – 0.91)  |
| <i>Neofelis spp.</i>     | <i>Prionodon linsang</i>          | Disturbed | carnivore-omnivore  | 0.67 (0.52 – 0.81)  |
| <i>Neofelis spp.</i>     | <i>Prionodon linsang</i>          | Intact    | carnivore-omnivore  | 0.71 (0.73 – 0.91)  |
| * <i>Neofelis spp.</i>   | * <i>Rusa unicolor</i>            | Disturbed | carnivore-herbivore | 0.67 (0.56 – 0.86)  |
| * <i>Neofelis spp.</i>   | * <i>Rusa unicolor</i>            | Intact    | carnivore-herbivore | 0.63 (0.54 – 0.73)  |
| * <i>Neofelis spp.</i>   | * <i>Sus barbatus</i>             | Disturbed | carnivore-omnivore  | 0.46 (0.35 – 0.56)  |
| * <i>Neofelis spp.</i>   | * <i>Sus barbatus</i>             | Intact    | carnivore-omnivore  | 0.39 (0.30 – 0.47)  |

|                        |                                   |           |                     |                    |
|------------------------|-----------------------------------|-----------|---------------------|--------------------|
| <i>*Neofelis spp.</i>  | <i>*Sus scrofa</i>                | Disturbed | carnivore-omnivore  | 0.50 (0.41 – 0.59) |
| <i>*Neofelis spp.</i>  | <i>*Sus scrofa</i>                | Intact    | carnivore-omnivore  | 0.37 (0.29 – 0.44) |
| <i>*Neofelis spp.</i>  | <i>*Tapirus indicus</i>           | Disturbed | carnivore-herbivore | 0.74 (0.61 – 0.87) |
| <i>*Neofelis spp.</i>  | <i>*Tapirus indicus</i>           | Intact    | carnivore-herbivore | 0.83 (0.75 – 0.92) |
| <i>Neofelis spp.</i>   | <i>Tragulus spp.</i>              | Disturbed | carnivore-herbivore | 0.67 (0.57 – 0.77) |
| <i>Neofelis spp.</i>   | <i>Tragulus spp.</i>              | Intact    | carnivore-herbivore | 0.52 (0.43 – 0.61) |
| <i>Neofelis spp.</i>   | <i>Trichys fasciculata</i>        | Disturbed | carnivore-herbivore | 0.55 (0.41 – 0.69) |
| <i>Neofelis spp.</i>   | <i>Trichys fasciculata</i>        | Intact    | carnivore-herbivore | 0.80 (0.66 – 0.94) |
| <i>Paguma larvata</i>  | <i>Panthera tigris</i>            | Disturbed | carnivore-omnivore  | 0.63 (0.49 – 0.78) |
| <i>Paguma larvata</i>  | <i>Panthera tigris</i>            | Intact    | carnivore-omnivore  | 0.44 (0.28 – 0.59) |
| <i>Panthera tigris</i> | <i>Paradoxurus hermaphroditus</i> | Disturbed | carnivore-omnivore  | 0.70 (0.57 – 0.82) |
| <i>Panthera tigris</i> | <i>Paradoxurus hermaphroditus</i> | Intact    | carnivore-omnivore  | 0.30 (0.17 – 0.43) |
| <i>Panthera tigris</i> | <i>Prionailurus spp.</i>          | Disturbed | carnivore-carnivore | 0.75 (0.63 – 0.88) |
| <i>Panthera tigris</i> | <i>Prionailurus spp.</i>          | Intact    | carnivore-carnivore | 0.46 (0.33 – 0.60) |
| <i>Panthera tigris</i> | <i>Prionodon linsang</i>          | Disturbed | carnivore-carnivore | 0.56 (0.42 – 0.71) |
| <i>Panthera tigris</i> | <i>Prionodon linsang</i>          | Intact    | carnivore-carnivore | 0.40 (0.25 – 0.55) |
| <i>Panthera tigris</i> | <i>Rusa unicolor</i>              | Disturbed | carnivore-herbivore | 0.85 (0.74 – 0.96) |
| <i>Panthera tigris</i> | <i>Rusa unicolor</i>              | Intact    | carnivore-herbivore | 0.73 (0.61 – 0.85) |
| <i>Panthera tigris</i> | <i>Sus barbatus</i>               | Disturbed | carnivore-omnivore  | 0.62 (0.50 – 0.74) |
| <i>Panthera tigris</i> | <i>Sus barbatus</i>               | Intact    | carnivore-omnivore  | 0.75 (0.62 – 0.88) |
| <i>Panthera tigris</i> | <i>Sus scrofa</i>                 | Disturbed | carnivore-omnivore  | 0.70 (0.57 – 0.83) |
| <i>Panthera tigris</i> | <i>Sus scrofa</i>                 | Intact    | carnivore-omnivore  | 0.78 (0.65 – 0.90) |
| <i>Panthera tigris</i> | <i>Tapirus indicus</i>            | Disturbed | carnivore-herbivore | 0.75 (0.63 – 0.88) |
| <i>Panthera tigris</i> | <i>Tapirus indicus</i>            | Intact    | carnivore-herbivore | 0.45 (0.32 – 0.58) |
| <i>Panthera tigris</i> | <i>Tragulus spp.</i>              | Disturbed | carnivore-herbivore | 0.75 (0.64 – 0.86) |
| <i>Panthera tigris</i> | <i>Tragulus spp.</i>              | Intact    | carnivore-herbivore | 0.74 (0.64 – 0.84) |

|                                   |                            |           |                     |                     |
|-----------------------------------|----------------------------|-----------|---------------------|---------------------|
| <i>Panthera tigris</i>            | <i>Trichys fasciculata</i> | Disturbed | carnivore-herbivore | 0.58 (0.44 – 0.72)  |
| <i>Panthera tigris</i>            | <i>Trichys fasciculata</i> | Intact    | carnivore-herbivore | 0.25 (0.098 – 0.40) |
| <i>Paradoxurus hermaphroditus</i> | <i>Prionailurus spp.</i>   | Disturbed | carnivore-herbivore | 0.77 (0.68 – 0.86)  |
| <i>Paradoxurus hermaphroditus</i> | <i>Prionailurus spp.</i>   | Intact    | carnivore-herbivore | 0.83 (0.75 – 0.91)  |
| <i>Paradoxurus hermaphroditus</i> | <i>Prionodon linsang</i>   | Disturbed | carnivore-herbivore | 0.77 (0.67 – 0.87)  |
| <i>Paradoxurus hermaphroditus</i> | <i>Prionodon linsang</i>   | Intact    | carnivore-herbivore | 0.73 (0.59 – 0.88)  |
| <i>Prionailurus spp.</i>          | <i>Tragulus spp.</i>       | Disturbed | carnivore-herbivore | 0.71 (0.63 – 0.78)  |
| <i>Prionailurus spp.</i>          | <i>Tragulus spp.</i>       | Intact    | carnivore-herbivore | 0.56 (0.49 – 0.62)  |
| <i>Prionailurus spp.</i>          | <i>Trichys fasciculata</i> | Disturbed | carnivore-herbivore | 0.75 (0.66 – 0.84)  |
| <i>Prionailurus spp.</i>          | <i>Trichys fasciculata</i> | Intact    | carnivore-herbivore | 0.74 (0.60 – 0.87)  |
| <i>Prionodon linsang</i>          | <i>Tragulus spp.</i>       | Disturbed | carnivore-herbivore | 0.47 (0.37 – 0.56)  |
| <i>Prionodon linsang</i>          | <i>Tragulus spp.</i>       | Intact    | carnivore-herbivore | 0.50 (0.38 – 0.61)  |
| <i>Prionodon linsang</i>          | <i>Trichys fasciculata</i> | Disturbed | carnivore-herbivore | 0.79 (0.65 – 0.92)  |
| <i>Prionodon linsang</i>          | <i>Trichys fasciculata</i> | Intact    | carnivore-herbivore | 0.62 (0.44 – 0.80)  |

**Supplementary Table 23. Mann-Whitney U test outputs at the guild-level for potential predatory interactions between intact (FLII > 8.77) and disturbed (FLII ≤ 8.77) forests.** ‘N’ refers to the number of species pairs used for the analysis. We also note that the statistical tests used are two-sided and no further statistical adjustments were conducted for each pairwise comparisons.

| <b>Predation type</b> | <b>N<sub>Disturbed</sub></b> | <b>N<sub>Intact</sub></b> | <b>Mean<sub>Intact</sub> (95% CI)</b> | <b>Mean<sub>Disturbed</sub> (95% CI)</b> | <b>U-statistics</b> | <b>P-value</b> |
|-----------------------|------------------------------|---------------------------|---------------------------------------|------------------------------------------|---------------------|----------------|
| carnivore-carnivore   | 8                            | 8                         | 0.58 (0.42 – 0.74)                    | 0.62 (0.55 – 0.68)                       | 14                  | 0.64           |
| carnivore-herbivore   | 39                           | 39                        | 0.53 (0.45 – 0.62)                    | 0.55 (0.45 – 0.61)                       | 331                 | 0.42           |
| carnivore-omnivore    | 22                           | 22                        | 0.59 (0.48 – 0.69)                    | 0.62 (0.54 – 0.69)                       | 100                 | 0.41           |
